1 **The myopathic transcription factor DUX4 induces the production of truncated RNA-**  
2 **binding proteins in human muscle cells**

3  
4 Amy E. Campbell<sup>1\*</sup>, Michael C. Dyle<sup>1\*</sup>, Lorenzo Calviello<sup>2\*</sup>, Tyler Matheny<sup>3</sup>, Michael A. Cortazar<sup>1</sup>,  
5 Thomas Forman<sup>4,5</sup>, Rui Fu<sup>3</sup>, Austin E. Gillen<sup>3</sup>, Stephen N. Floor<sup>2,6</sup>, and Sujatha Jagannathan<sup>1,3†</sup>

6  
7 <sup>1</sup>Department of Biochemistry and Molecular Genetics, University of Colorado Anschutz Medical  
8 Campus, Aurora, CO 80045, USA.

9 <sup>2</sup>Department of Cell and Tissue Biology, University of California, San Francisco, San Francisco,  
10 CA 94143, USA.

11 <sup>3</sup>RNA Bioscience Initiative, University of Colorado Anschutz Medical Campus, Aurora, CO  
12 80045, USA.

13 <sup>4</sup>Department of Craniofacial Biology, University of Colorado Anschutz Medical Campus, Aurora,  
14 CO 80045, USA.

15 <sup>5</sup>Medical Scientist Training Program, University of Colorado Anschutz Medical Campus, Aurora,  
16 CO 80045, USA.

17 <sup>6</sup>Helen Diller Family Comprehensive Cancer Center, University of California, San Francisco,  
18 San Francisco, CA 94143, USA.

19  
20 \*These authors contributed equally

21 †Correspondence: [sujatha.jagannathan@cuanschutz.edu](mailto:sujatha.jagannathan@cuanschutz.edu)

22  
23 Running title: DUX4 promotes truncated protein production

24 Keywords: DUX4, FSHD, NMD, translation, splicing

25 **ABSTRACT**

26 DUX4 is an embryonic transcription factor whose misexpression in skeletal muscle causes  
27 facioscapulohumeral muscular dystrophy (FSHD). DUX4 induces the transcription of thousands  
28 of RNAs and dysregulates multiple pathways that could contribute to FSHD pathophysiology.  
29 However, lack of temporal data and the knowledge of which RNAs are actively translated  
30 following DUX4 expression has hindered our understanding of the cascade of events that lead  
31 to muscle cell death. Here, we interrogate the DUX4 transcriptome and translome over time  
32 and find dysregulation of most key pathways as early as 4 hours after DUX4 induction,  
33 demonstrating the potent effect of DUX4 in disrupting muscle biology. We also observe  
34 extensive transcript downregulation as well as induction, and a high concordance between  
35 mRNA abundance and translation status. Significantly, DUX4 triggers widespread production of  
36 truncated protein products derived from aberrant RNAs that are degraded in normal muscle  
37 cells. One such protein, truncated serine/arginine-rich splicing factor 3 (SRSF3-TR), is present  
38 in FSHD muscle cells and disrupts splicing autoregulation when ectopically expressed in  
39 myoblasts. Taken together, the temporal dynamics of DUX4 induction show how the pathologic  
40 presence of an embryonic transcription factor in muscle cells alters gene expression to  
41 ultimately perturb RNA homeostasis.

## 42 INTRODUCTION

43 Facioscapulohumeral muscular dystrophy (FSHD) is a prevalent progressive myopathy caused  
44 by misexpression of an early embryonic transcription factor, DUX4, in skeletal muscle (Hamel &  
45 Tawil, 2018; Tawil, van der Maarel, & Tapscott, 2014). Sustained DUX4 expression is toxic to  
46 somatic cells and induces apoptotic death, leading to skeletal muscle atrophy in individuals with  
47 FSHD (Bosnakovski et al., 2008; Kowaljow et al., 2007; Rickard, Petek, & Miller, 2015; Wallace  
48 et al., 2011). In the decade since the elucidation of a unifying genetic model for FSHD  
49 (Lemmers et al., 2010), much work investigating the molecular consequences of DUX4  
50 expression has led to the discovery of myriad altered genes and pathways that are associated  
51 with FSHD pathophysiology (Campbell, Belleville, Resnick, Shadle, & Tapscott, 2018; Lim,  
52 Nguyen, & Yokota, 2020). Efforts to determine which genes or pathways downstream of DUX4  
53 misexpression cause FSHD are just beginning. Such understanding is critical for the  
54 development of effective therapeutics for FSHD.

55  
56 Previous genome-wide studies of DUX4-mediated gene expression have been performed as  
57 endpoint assays in cell populations that have seen long periods of DUX4 misexpression and are  
58 likely already undergoing apoptosis (Bosnakovski et al., 2019; Geng et al., 2012; Jagannathan,  
59 Ogata, Gafken, Tapscott, & Bradley, 2019; Jagannathan et al., 2016; Lek et al., 2020; Resnick  
60 et al., 2019; Shadle et al., 2019; Shadle et al., 2017; Sharma, Harafuji, Belayew, & Chen, 2013;  
61 Whiddon, Langford, Wong, Zhong, & Tapscott, 2017). Although mechanisms underlying DUX4-  
62 induced cytotoxicity have been uncovered this way, it has also been shown that important  
63 pathologic processes occur in distinct temporal order. For example, inhibition of the RNA quality  
64 control pathway nonsense-mediated decay (NMD) by DUX4 was shown to occur early in the  
65 course of DUX4 expression while proteotoxic stress was a later event (Feng et al., 2015;  
66 Jagannathan et al., 2019). Therefore, genome-wide time course studies are needed to identify  
67 early changes in gene expression or cellular pathways that lead to skeletal muscle cell death.

68  
69 While DUX4 induces widespread transcriptomic changes, proteomics shows that many genes  
70 display discordant transcript and protein levels (Jagannathan et al., 2019). Given the sparse  
71 nature of proteomics data, sequencing-based measurement of active translation is necessary to  
72 determine if the observed discordance between RNA and protein levels in DUX4-expressing  
73 cells is the result of altered translation regulation or protein stability. Such a measure would also  
74 reveal whether the aberrant RNAs stabilized by DUX4-mediated NMD inhibition (Feng et al.,  
75 2015) produce truncated proteins.

76 To identify early transcript- and translation-level changes induced by DUX4, we performed  
77 paired RNA-sequencing (RNA-seq) and ribosome profiling (Ribo-seq) at 0, 4, 8, and 14 h  
78 following the expression of DUX4 in MB135-iDUX4 human skeletal muscle myoblasts. MB135-  
79 iDUX4 cells are a well-characterized model of FSHD that robustly recapitulates the  
80 consequences of endogenous DUX4 expression in FSHD muscle (Jagannathan et al., 2016;  
81 Yao et al., 2014). While RNA-seq measures transcript abundance, Ribo-seq measures  
82 ribosome-protected RNA fragments, allowing quantification of ribosome density along an mRNA  
83 that serves as a proxy for active translation (Ingolia, 2014). Ribo-seq also enables precise  
84 delineation of translation start and end sites to characterize the protein products made from  
85 aberrant RNAs.

86

87 We found that ~1600 genes show a significant change at the transcript level after 4 h of DUX4  
88 induction, including many that are repressed; most pathways known to be misregulated by  
89 DUX4 are altered at this early time point. We also found a high concordance of changes in  
90 mRNA abundance and translation status, suggesting that post-transcriptional modulation by  
91 DUX4 (Jagannathan et al., 2019) occurs primarily at the level of protein stability. Notably, the  
92 hundreds of aberrant RNAs stabilized by DUX4-mediated inhibition of NMD (Feng et al., 2015)  
93 are actively translated to produce truncated proteins, including truncated RNA-binding proteins  
94 (RBPs) and splicing factors. We show that one such truncated splicing factor, truncated  
95 serine/arginine-rich splicing factor 3 (SRSF3-TR), is expressed in FSHD muscle cell cultures  
96 and perturbs splicing homeostasis when ectopically expressed in myoblasts. Together, our  
97 results illustrate the importance of misregulated RNA quality control in DUX4-induced pathology.

## 98 RESULTS

99

### 100 Identification of time points for paired RNA-seq and Ribo-seq in DUX4-expressing cells

101 Misexpression of DUX4 in skeletal muscle cells is cytotoxic (Geng et al., 2012; Jagannathan et  
102 al., 2016; Rickard et al., 2015). To identify time points at which to measure transcript- and  
103 translation-level changes induced by DUX4 before the onset of overt cytotoxicity, we utilized a  
104 well-characterized doxycycline-inducible DUX4 human myoblast line, MB135-iDUX4  
105 (Jagannathan et al., 2016), harboring a DUX4-responsive fluorescent reporter (**Figure 1A**). We  
106 live imaged these cells every 15 min for 28 h following doxycycline treatment to induce DUX4  
107 (**Figure 1B, Video 1**). In the absence of doxycycline, a very low level of 'leaky' DUX4  
108 expression was observed, which is consistent with studies in other doxycycline-driven DUX4  
109 induction systems (Bosnakovski, Chan, et al., 2017; Dandapat et al., 2014). In the presence of  
110 doxycycline, expression of the DUX4-responsive fluorescent reporter was rapid and nearly  
111 synchronous, with fluorescence detectable after 2 h. Most cells fluoresced after 4 h, with  
112 fluorescence intensity increasing until 6 h at which point it plateaued. Cytotoxicity was first  
113 observed 9 h following DUX4 induction (**Figure 1B**). Myoblasts continued to round up and  
114 detach, resulting in a culture where most cells were dead or dying by 18 h. Given these data, we  
115 limited our study to time points  $\leq 14$  h to identify early and direct gene expression changes  
116 induced by DUX4.

117

118 To study the temporal trajectory of known DUX4-induced gene expression changes in important  
119 cellular pathways, we carried out quantitative reverse transcription PCR (RT-qPCR) using RNA  
120 extracted from the parental MB135-iDUX4 myoblast line. At 4 h we observed robust induction of  
121 the DUX4 target gene ZSCAN4 (**Figure 1C**, top left) and repression of the myogenic program  
122 (**Figure 1C**, top right), which is exquisitely sensitive to DUX4 misexpression (Bosnakovski et al.,  
123 2018; Bosnakovski et al., 2008). In contrast, other consequences of DUX4 expression, such as  
124 upregulation of pericentric human satellite II repeats (Shadle et al., 2019), activation of the  
125 unfolded protein response (Jagannathan et al., 2019), perturbed Wnt signaling (C. R. Banerji et  
126 al., 2015), and downregulation of oxidative stress response genes (Bosnakovski et al., 2008)  
127 are more prominent at later time points (**Figure 1C**, remaining panels). Based on our measures  
128 of DUX4 activity, perturbation of downstream pathways, and myoblast cell death, 4, 8, and 14 h  
129 were chosen as informative early, mid, and late time points to measure transcript- and  
130 translation-level changes induced by misexpression of DUX4, with the 0 h time point serving as

131 a control. Therefore, we performed standard RNA-seq paired with Ribo-seq in parental MB135-  
 132 iDUX4 myoblasts induced to express DUX4 for 0, 4, 8, or 14 h (**Figure 1D**).

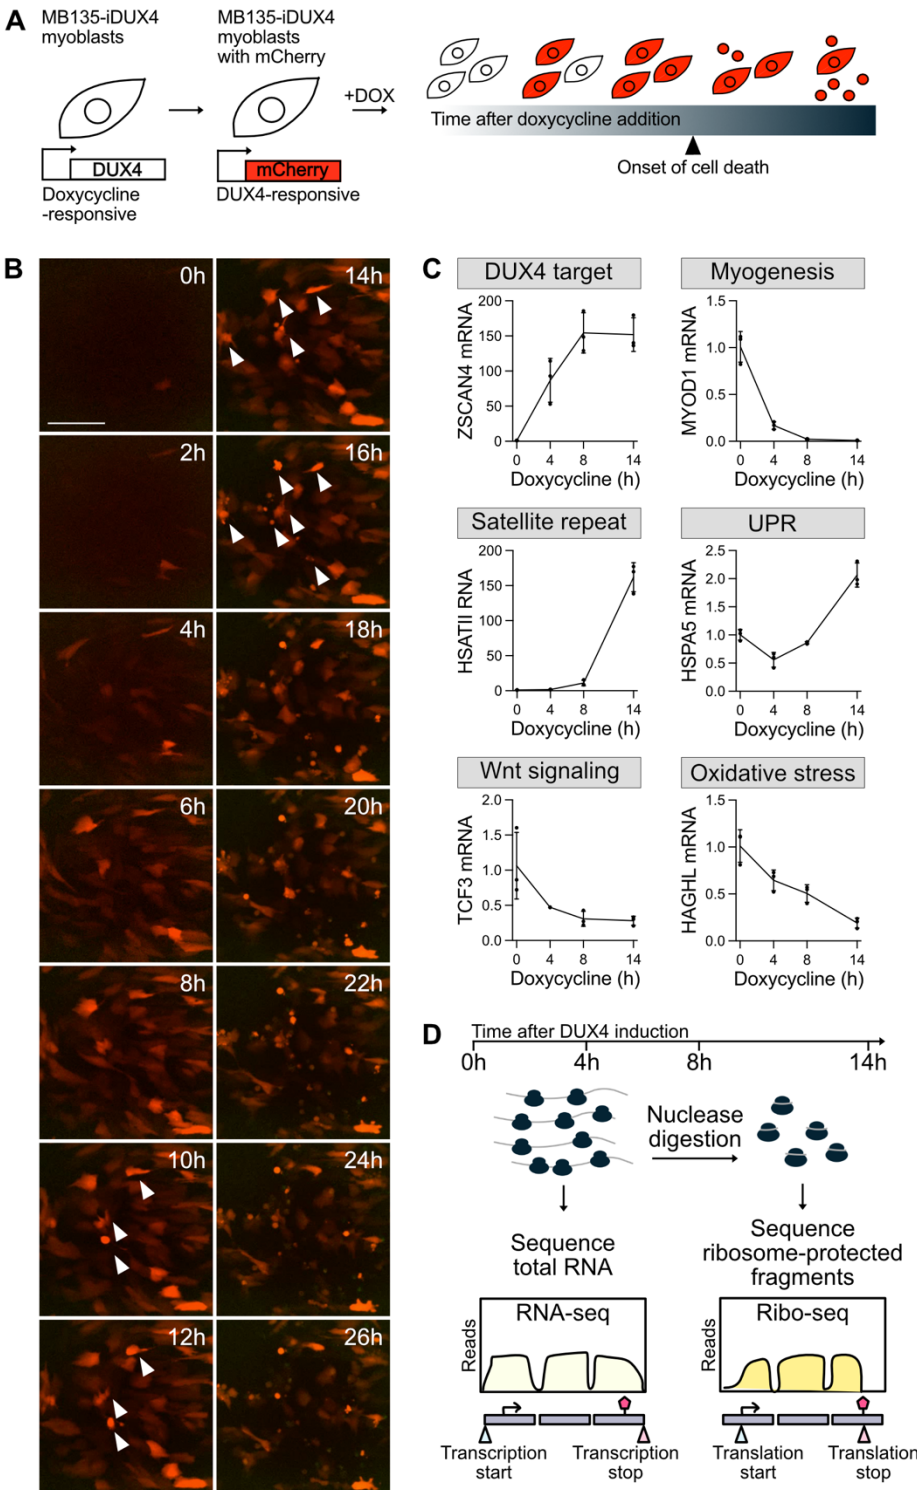

**Figure 1. Synchronous expression of DUX4 in MB135-iDUX4 myoblasts enables time course analyses of downstream gene expression changes.**

(A) Schematic representation of the inducible DUX4 expression systems used in this study and the experimental outline to identify informative time points prior to the onset of cell death. (B) Still images from live cell fluorescence microscopy of MB135-iDUX4/ZSCAN4-mCherry myoblasts every 2 h following treatment with doxycycline to induce DUX4. Arrowheads indicate overtly dying cells. Scale bar, 150  $\mu$ m. (C) Relative RNA levels of ZSCAN4, MYOD1, HSATII, HSPA5, TCF3, and HAGHL determined by RT-qPCR following treatment with doxycycline to induce DUX4 in MB135-iDUX4 myoblasts. Error bars denote the standard deviation from the mean of three biological replicates, which are shown as individual data points. (D) A schematic representation of the paired RNA-seq and Ribo-seq experiment. RNA was harvested from MB135-iDUX4 myoblasts treated with doxycycline to induce DUX4 for 0, 4, 8, or 14 h and either directly sequenced (RNA-seq) or digested with nuclease to degrade non-ribosome-protected RNA and the protected fragments sequenced (Ribo-seq).



### 133 **DUX4 triggers early-onset disruption of key pathways involved in FSHD**

134 We examined DUX4-induced transcriptome changes revealed by our RNA-seq dataset  
135 (**Supplementary Table 1**). As expected, the housekeeping gene RPL27 had constant, robust  
136 RNA expression throughout the time course (**Figure 2A**, top). Transcripts of a DUX4 target  
137 gene, ZSCAN4, were absent in uninduced cells but highly expressed at 4 h and increased with  
138 time, while transcripts from a myogenic gene, MYOD1, displayed the opposite trend (**Figure 2A**,  
139 middle and bottom). Genome-wide, DUX4 altered the expression of thousands of transcripts,  
140 with known DUX4 targets (Yao et al., 2014) showing increasing upregulation throughout the  
141 time course (**Figure 2B**). Notably, there were 1674 genes whose expression significantly  
142 changed after only 4 h of DUX4 induction with similar numbers activated and repressed. Genes  
143 underlying pathways known to be involved in FSHD pathology are already significantly altered  
144 at the 4 h time point (**Figure 2 – figure supplement 1A**), suggesting that DUX4 sets up  
145 cascades of misregulation very early after its expression in muscle cells.

146  
147 To identify novel pathways altered by DUX4, we used k-means clustering to group genes  
148 significantly altered (defined as absolute log<sub>2</sub> fold change > 1 and adjusted p-value < 0.01) at  
149 any point during the time course into five clusters (**Figure 2 – figure supplement 1B**) and  
150 carried out gene ontology (GO) analysis on each cluster (**Figure 2C-E**, **Supplementary Table**  
151 **2**). We observed that Cluster 1, which is comprised of 181 genes rapidly induced upon DUX4  
152 expression, returns GO categories that could underlie DUX4's normal role in establishing an  
153 early embryonic program – negative regulation of cell differentiation, positive regulation of cell  
154 proliferation, and DNA-templated transcription. The 692 genes that are rapidly silenced (Cluster  
155 5) are enriched for GO categories related to myogenesis, positive regulation of cell  
156 differentiation, and cytoskeleton organization. Together, this is suggestive of a general switch  
157 away from a differentiated muscle program and towards a proliferative phenotype. Cluster 2  
158 (583 genes) that is less robustly induced and Cluster 4 (2462 genes) that is less robustly  
159 repressed are enriched for broad GO categories illustrative of the many fundamental cellular  
160 processes that are altered upon DUX4 misexpression. Cluster 3 (2243 genes), which is induced  
161 only at the late 14 h time point is enriched for GO categories mRNA splicing, ribonucleoprotein  
162 transport, and ubiquitin-dependent process, which have previously been reported as some of  
163 the major signatures of DUX4-induced gene expression (Geng et al., 2012; Jagannathan et al.,  
164 2016; Rickard et al., 2015). Together, these time course RNA-seq data show that each pathway  
165 misregulated by DUX4 has a unique temporal signature following DUX4 induction and suggest  
166 that a combination of perturbed cellular systems underlies DUX4 toxicity.

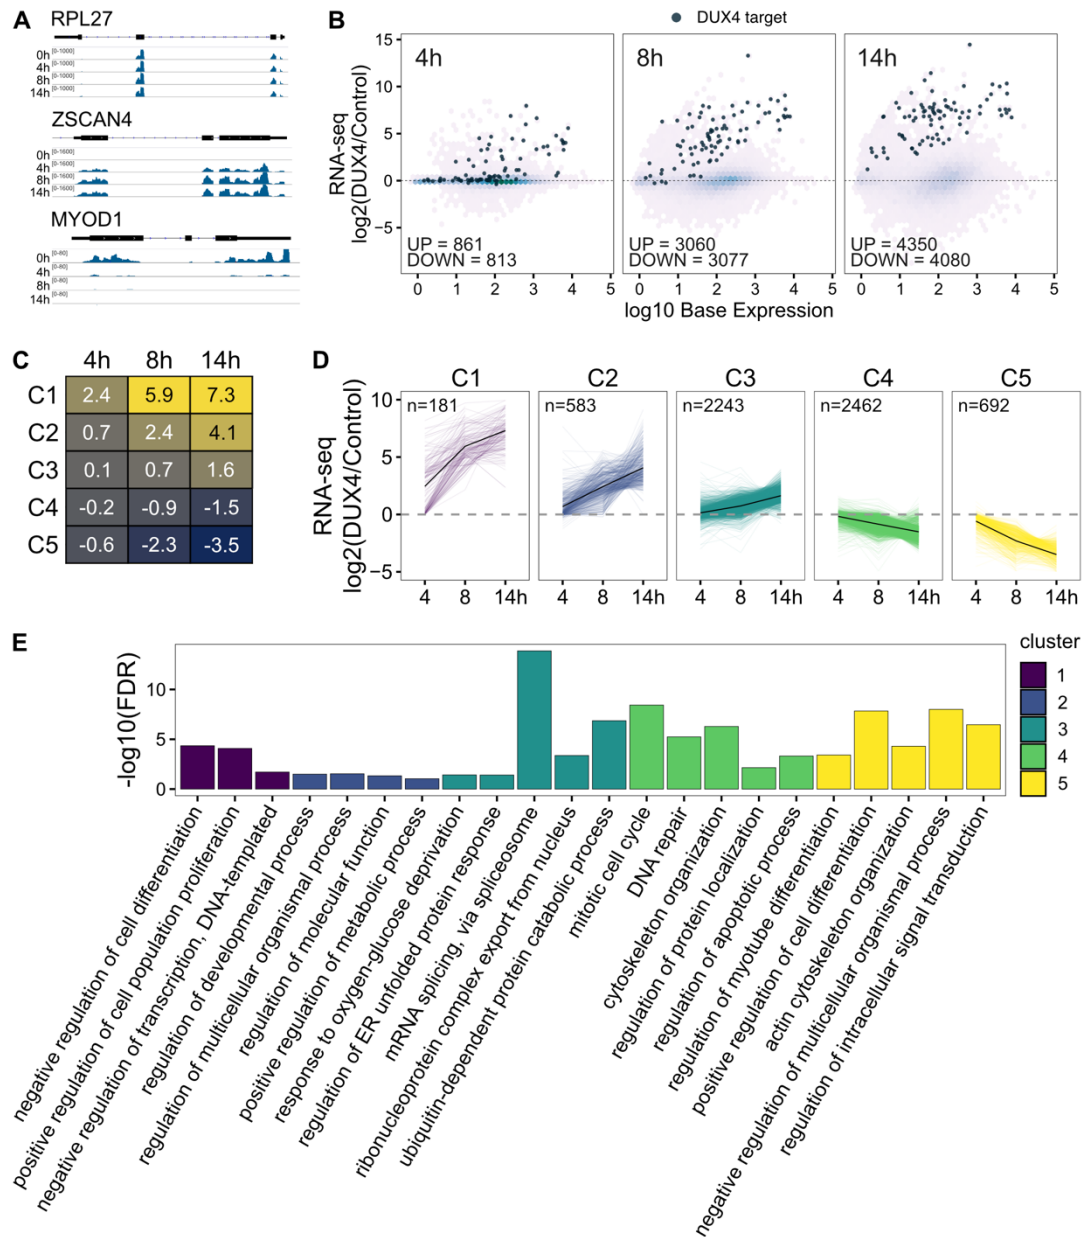

**Figure 2. Time course RNA-seq in MB135-iDUX4 myoblasts reveals early transcript-level changes in pathways underlying FSHD pathology.** (A) RNA-seq read coverage over a time course of DUX4 expression for housekeeping gene RPL27 (top), DUX4 target gene ZSCAN4 (middle), and myogenic factor MYOD1 (bottom). (B) M-A plots for RNA-seq data after 4, 8, and 14 h of DUX4 induction compared to the 0 h control. DUX4 target status defined as in (Yao et al., 2014). (C) Heatmap depicting the clustering of all genes significantly differentially expressed upon DUX4 induction. The numbers within the heatmap represent the mean  $\log_2$  fold change for the genes within that cluster. C, cluster. (D)  $\log_2$  fold change in RNA expression from the 0 h time point is shown for each gene in each cluster defined in (C). C, cluster. The thick black line represents the cluster mean. (E) GO analysis results of selected gene sets (biological process complete) that are significantly enriched in each cluster defined in (C).

## 167 Most DUX4-induced coding transcripts are robustly translated

168 A previous study that used stable isotope labeling by amino acids in cell culture (SILAC) mass  
169 spectrometry to measure the DUX4 proteome revealed extensive post-transcriptional gene  
170 regulation including discordant changes at the RNA versus protein level, particularly for genes



171 involved in RNA quality control (Jagannathan et al., 2019). While powerful, this study could not  
172 provide a complete index of all expressed proteins due to inherent limitations in mass  
173 spectrometry technology. Ribo-seq, by measuring which mRNAs are actively translated, is  
174 capable of identifying the proteins being produced with greater depth than proteomics.  
175 Additionally, DUX4 induces eIF2 $\alpha$  phosphorylation at later time points in MB135 myoblasts  
176 (Jagannathan et al., 2019; Shadle et al., 2017), which is thought to generally inhibit cap-  
177 dependent translation (Proud, 2005), but the effect of this on protein expression in DUX4-  
178 expressing cells is unknown. Therefore, we asked whether transcript level changes driven by  
179 DUX4 misexpression were echoed at the level of translation by comparing the RNA-seq and  
180 Ribo-seq datasets. To verify the quality of our Ribo-seq data, we confirmed that reads exhibited  
181 the characteristic 3 nucleotide periodicity indicative of ribosome-protected RNA fragments  
182 (**Figure 3 – figure supplement 1**). Representative Ribo-seq read coverage plots of the  
183 housekeeping gene RPL27 showed constant, robust translation throughout the time course  
184 (**Figure 3A**, top). In contrast, a DUX4 target gene, ZSCAN4, showed no coverage in uninduced  
185 cells, low ribosome density beginning at 4 h, and active translation at 8 and 14 h (**Figure 3A**,  
186 middle). MYOD1 was robustly translated at 0 h but rapidly downregulated (**Figure 3A**, bottom).  
187 The changes in translation status at these specific genes mirrored the differences seen in their  
188 mRNA levels (**Figure 2A**).

189  
190 On a genome scale, DUX4 altered the translation status for thousands of transcripts, with later  
191 time points showing larger differences and known DUX4 targets being translated at increasing  
192 levels throughout the time course (**Figure 3B**, **Supplementary Table 3**). Strikingly, most genes  
193 were concordantly up or downregulated at the level of transcript and translation status (**Figure**  
194 **3C**, Materials and Methods) at all three time points with only a small number of genes showing  
195 some discordance. GO analysis of the discordantly regulated genes returned significant results  
196 only for the gene set ( $n = 137$ ) that showed a mild translation downregulation at the 14 h time  
197 point with pathways such as protein targeting to ER and viral transcription being enriched  
198 (**Supplementary Table 3**). This likely represents a small subset of genes that are affected by  
199 the inhibition of cap-dependent translation due to eIF2 $\alpha$  phosphorylation. In contrast, a pairwise  
200 correlation analysis of the RNA-seq, Ribo-seq and our previous SILAC proteomics  
201 (Jagannathan et al., 2019) data demonstrated that both RNA and translation status are  
202 discordant with protein levels (**Figure 3D**). Overall, these data show a high concordance of  
203 transcript level and ribosome occupancy in DUX4-expressing cells, demonstrating that post-

204 transcriptional modulation by DUX4 likely occurs at the level of protein stability rather than  
 205 protein synthesis.

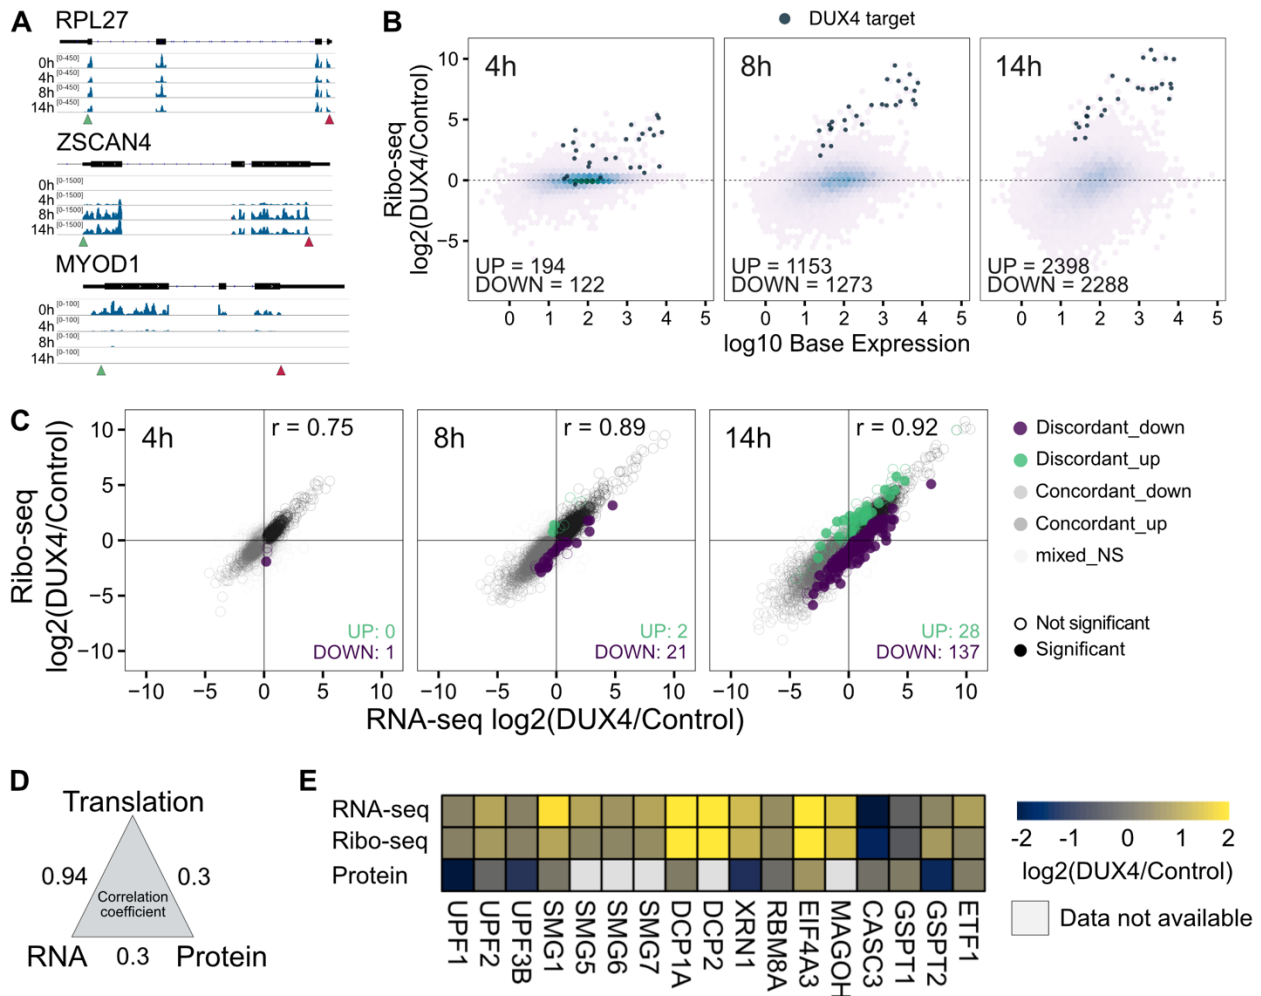

**Figure 3. Ribo-seq shows high concordance between transcript levels and translation status.** (A) Ribo-seq read coverage over a time course of DUX4 expression for housekeeping gene RPL27 (top), DUX4 target gene ZSCAN4 (middle), and myogenic factor MYOD1 (bottom). Green triangle, translation start. Red triangle, translation stop. (B) M-A plots for Ribo-seq data after 4, 8, and 14 h of DUX4 induction compared to the 0 h control. (C) Scatter plot of RNA-seq versus Ribo-seq log<sub>2</sub> fold change after 4, 8, and 14 h of DUX4 expression. Significance defined as adjusted p-value < 0.01 for Ribo-seq fold change. (D) Pearson's correlation coefficient for the log<sub>2</sub> fold change values computed for genes with quantification in all datasets (RNA-seq, Ribo-seq, and SILAC proteomics; n = 4854 genes). (E) Heatmap showing RNA-seq, Ribo-seq, and proteomics log<sub>2</sub> fold change values of NMD factors.

206 We have previously shown that DUX4 induction leads to detectably lower protein abundance of  
 207 key NMD factors such as UPF1, SMG6, and XRN1, and that UPF1 is proteolytically degraded  
 208 (Feng et al., 2015; Jagannathan et al., 2019). We sought to determine if other NMD factors  
 209 follow a mechanism similar to UPF1 or if their downregulation could be due to lowered  
 210 translation of these proteins. Comparing RNA abundance from our RNA-seq data, translation  
 211 status from our Ribo-seq data, and protein level from our previous proteomics data  
 212 (Jagannathan et al., 2019) for all NMD factors showed that transcript level and translation is

213 highly concordant, while protein level is not (**Figure 3E**). This confirms that multiple key NMD  
214 factors are indeed downregulated at the protein level without a corresponding change in their  
215 RNA level or translation status, pointing to protein stability as the mode of regulation by DUX4.  
216

### 217 **DUX4 causes widespread truncated protein production**

218 Having established that most transcripts induced by DUX4 are robustly translated, we wanted to  
219 determine if truncated proteins are produced from RNAs containing premature translation  
220 termination codons (PTCs) stabilized as a result of DUX4-mediated NMD inhibition (Feng et al.,  
221 2015). Western blot analysis showed that levels of the key NMD factor UPF1 were reduced by  
222 65% after only 4 h of DUX4 induction (**Figure 4A**). UPF1 levels fall further to 13% and 1% of  
223 baseline at 8 and 14 h, respectively. This confirmed our previous observation that NMD  
224 inhibition is an early event in the course of DUX4 expression (Feng et al., 2015), and suggested  
225 that proteins resulting from the translation of NMD-targeted, stabilized aberrant RNAs should  
226 appear in our dataset.

227  
228 To ask if and when aberrant RNAs are translated, we used ORFquant (Calviello, Hirsekorn, &  
229 Ohler, 2020), a new pipeline that identifies isoform-specific translation events from Ribo-seq  
230 data. We then used DEXSeq (Anders, Reyes, & Huber, 2012) to conduct exon-level differential  
231 analysis on the set of ORFquant-derived open reading frames, using Ribo-seq data. This  
232 analysis identifies changes in relative exon usage to measure differences in the expression of  
233 individual exons that are not simply the consequence of changes in overall transcript level. After  
234 4 h of DUX4 induction 397 genes showed differential expression of specific exons, of which only  
235 24 are predicted NMD targets (**Figure 4B**), whereas later time points showed a greater fraction  
236 of exons that are unique to NMD targets as differentially expressed (**Supplementary Table 4**).  
237 We grouped exons based on their NMD target status and calculated their fold change in  
238 ribosome footprints at 4, 8, and 14 h of DUX4 expression compared to the 0 h time point  
239 (**Figure 4C**). We observed a progressive and significant increase in the translation status of  
240 NMD-targeted exons at 8 and 14 h, confirming the translation of stabilized aberrant RNAs in  
241 DUX4-expressing cells.

242  
243 Translation of an NMD target typically generates a prematurely truncated protein. To ask how  
244 the specific truncated proteins being produced in DUX4-expressing myoblasts might functionally  
245 impact cell homeostasis, we conducted GO analysis of the 74 truncated proteins being actively  
246 translated at 14 h of DUX4 induction (**Figure 4D, Supplementary Table 4**). Strikingly, the

247 truncated proteins are enriched for genes encoding RBPs involved in mRNA metabolism and  
 248 specifically, splicing (**Supplementary Table 4**). Examples include genes such as IVNS1ABP,  
 249 SRSF3, SRSF6, and SRSF7 (**Figure 4E**). Thus, not only are NMD targets stabilized by DUX4  
 250 expression but they also produce truncated versions of many RBPs, which could have  
 251 significant downstream consequences to mRNA processing in DUX4-expressing cells.

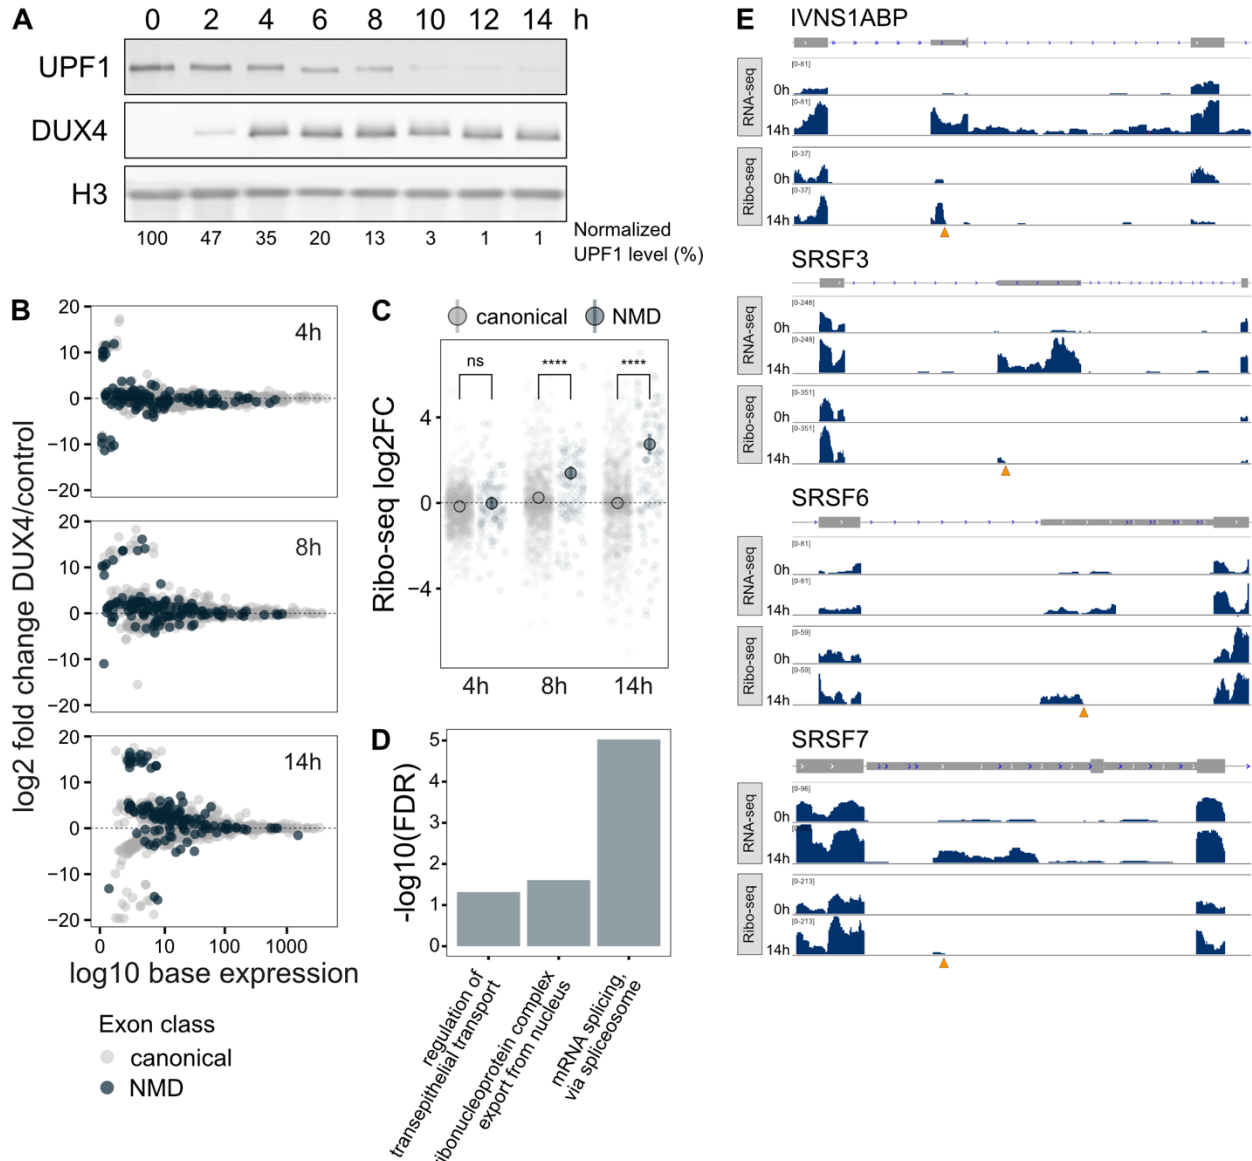

**Figure 4. Exon-level analysis of Ribo-seq data demonstrates robust translation of NMD-targeted aberrant RNAs.** (A) Western blot analysis for UPF1, DUX4, and Histone H3 (loading control) over a time course of DUX4 expression following doxycycline induction in MB135-iDUX4 myoblasts. (B) M-A plot of exon-level analysis of Ribo-seq data from 4, 8, and 14 h of DUX4 induction. The x-axis represents mean expression calculated at the level of each exon within a gene. (C) Exon-level log<sub>2</sub> fold change Ribo-seq values at 4, 8, or 14 h of DUX4 expression for canonical and NMD exons. Statistical testing was performed using a two-sided Wilcoxon test. (D) GO analysis results of selected gene sets (biological process complete) for all NMD targets that are translated at 14 h. (E) RNA-seq and Ribo-seq coverage over splicing-related genes IVNS1ABP, SRSF3, SRSF6, and SRSF7. The orange triangles denote PTCs.

## 252 **Truncated SRSF3 is present in FSHD myotubes and perturbs RNA homeostasis**

253 To explore the role truncated proteins play in DUX4-induced cellular phenotypes, we chose  
254 SRSF3 for further characterization. SRSF3 is an SR family protein that possesses an N-terminal  
255 RNA-binding RNA recognition motif (RRM) and a C-terminal arginine/serine (RS)-rich domain  
256 responsible for protein-protein and protein-RNA interactions. SRSF3 is a multifunctional splicing  
257 factor involved in transcriptional, co-transcriptional, and post-transcriptional regulation and has  
258 been implicated in a variety of human pathologies including heart disease, Alzheimer's, and  
259 cancer (More & Kumar, 2020; Zhou et al., 2020). Examination of our paired RNA-seq and Ribo-  
260 seq data revealed robust expression of SRSF3 NMD-targeted exon 4 after 8 h of DUX4  
261 induction, followed by robust translation of this exon that ends at the site of the PTC (**Figure**  
262 **5A**).

263  
264 To confirm translation of the aberrant SRSF3 RNA stabilized by DUX4, we carried out polysome  
265 profiling using sucrose density gradient separation. As expected, the polysome profile after 14 h  
266 of DUX4 expression showed a higher fraction of 80S monosomes compared to polysomes  
267 (**Figure 5B**, top left), consistent with our observation of eIF2 $\alpha$  phosphorylation and general  
268 downregulation of translation at this and later time points of DUX4 expression (Jagannathan et  
269 al., 2019; Shadle et al., 2017). We extracted RNA from various fractions and found that RPL27  
270 mRNA was ribosome-bound in both control and DUX4-expressing cells, as evidenced by its  
271 association with monosomes and polysomes and as expected for a housekeeping gene (**Figure**  
272 **5B**, top right). In contrast, DUX4 mRNA and mRNA of the DUX4 target gene ZSCAN4 are highly  
273 translated only in DUX4-expressing myoblasts, as indicated by their enrichment in heavy  
274 polysomes (**Figure 5B**, middle). The normal SRSF3 isoform (SRSF3-Excl) is enriched in heavy  
275 polysomes in both control and DUX4-expressing myoblasts but is less abundant in the latter  
276 (**Figure 5B**, bottom left). In contrast, the NMD-targeted isoform of SRSF3 (SRSF3-Incl), also  
277 enriched in heavy polysomes in both conditions, was significantly more abundant in DUX4-  
278 expressing cells (**Figure 5B**, bottom right). These data confirm that aberrant SRSF3 mRNA is  
279 being actively translated into truncated protein in DUX4-expressing myoblasts.

280  
281 To determine if we could detect truncated SRSF3 protein, we generated a custom antibody  
282 recognizing a 10 amino acid C-terminal neo-peptide unique to SRSF3-TR. This custom SRSF3-  
283 TR antibody was able to recognize FLAG-tagged SRSF3-TR exogenously expressed in 293T  
284 cells and endogenous SRSF3-TR immunoprecipitated from DUX4-expressing MB135-iDUX4  
285 myoblasts (**Figure 5C**). We also used a commercial SRSF3 antibody that recognizes an N-



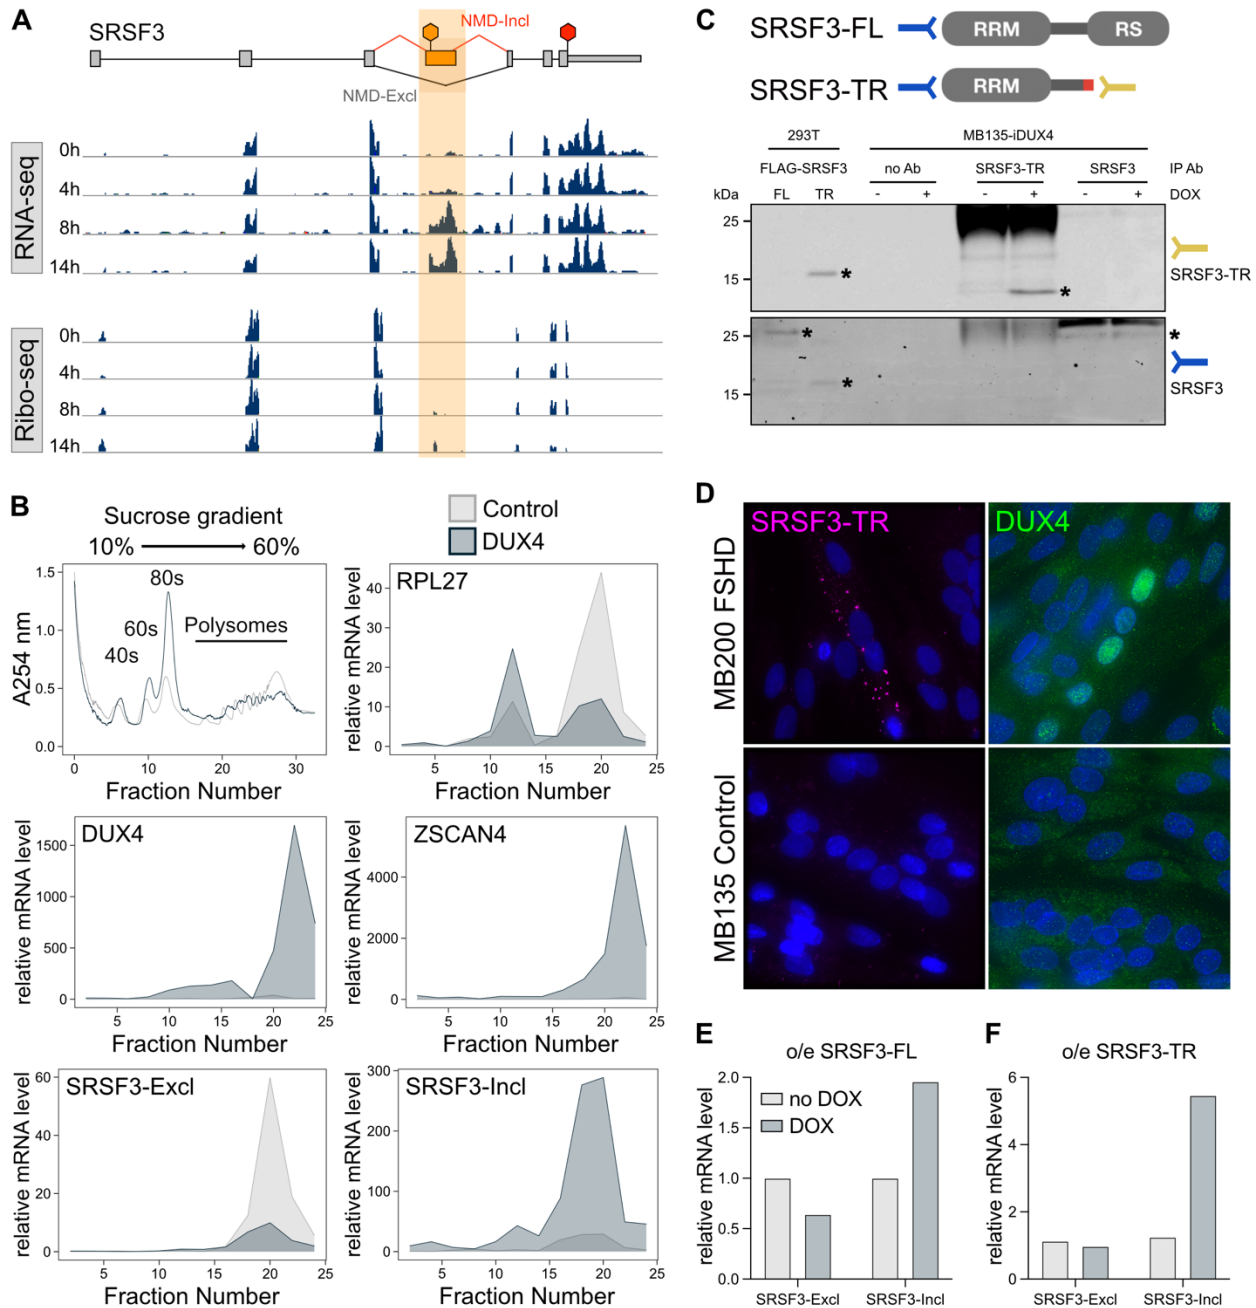

**Figure 5. Truncated SRSF3 protein could disrupt RNA processing in FSHD myotubes. (A)** RNA-seq and Ribo-seq coverage over SRSF3. The PTC-containing exon 4 is highlighted. The red hexagon indicates the normal stop codon while the orange hexagon denotes the PTC. **(B)** Absorbance at 254 nm across a sucrose density gradient of lysates from control MB135-iDUX4 myoblasts and MB135-iDUX4 myoblasts expressing DUX4 for 14 h (top left). RT-qPCR measurement of RPL27, DUX4, ZSCAN4, SRSF3-Excl, and SRSF3-Incl mRNA levels in DUX4-expressing myoblasts relative to control myoblasts from collected fractions (remaining panels). **(C)** Detection of SRSF3 and SRSF3-TR in whole cell extracts from 293T cells exogenously expressing FLAG-tagged full-length (FL) or truncated (TR) SRSF3 as compared to protein lysates from MB135-iDUX4 myoblasts treated with (+) or without (-) doxycycline (DOX) to induce DUX4 and immunoprecipitated with a custom anti-SRSF3-TR antibody, no antibody (Ab), or a commercial SRSF3 antibody. IP, immunoprecipitation. Asterisks denote proteins of interest. **(D)** Immunofluorescence staining in MB135 control and MB200 FSHD myotubes differentiated for 72 h and stained with DAPI (blue) and rabbit anti-DUX4 (green) or custom rabbit anti-SRSF3-TR (pink) antibody. **(E)** SRSF3-Excl and -Incl mRNA isoform levels as determined by RT-qPCR following induction of full-length (FL) or truncated (TR) SRSF3 in MB135-iFLAG-SRSF3-FL or -TR myoblasts by treatment with doxycycline for 72 h.



286 terminal epitope common to both the full-length and truncated SRSF3. This antibody detected  
287 both exogenously expressed full-length and truncated FLAG-SRSF3, and endogenous full-  
288 length SRSF3, but was insufficient to visualize endogenous SRSF3-TR (**Figure 5C**), possibly  
289 due to lower affinity for this protein isoform in an immunoprecipitation assay. To determine if  
290 SRSF3-TR was present in FSHD myotubes expressing endogenous levels of DUX4, we carried  
291 out immunofluorescence for SRSF3-TR or DUX4 in differentiated FSHD and control muscle  
292 cells. While there was no detectable SRSF3-TR staining in control cells, in DUX4-expressing  
293 FSHD cultures SRSF3-TR appeared in cytoplasmic puncta (**Figure 5D**). Together, these data  
294 show that endogenous SRSF3-TR is present at detectable levels in DUX4-expressing MB135-  
295 iDUX4 and FSHD cells.

296

297 To explore the functional consequences of SRSF3-TR expression, we exogenously expressed  
298 FLAG-tagged full-length or truncated SRSF3 in healthy muscle cells. As previously described,  
299 full-length SRSF3 decreased the level of the normal SRSF3 mRNA isoform and increased the  
300 aberrant isoform ((Jumaa & Nielsen, 1997); **Figure 5E**). Strikingly, SRSF3-TR led to a 5-fold  
301 upregulation of the endogenous SRSF3 aberrant mRNA isoform (**Figure 5F**). These data  
302 suggest that DUX4-induced translation of SRSF3-TR may feedback to create more aberrant  
303 RNA and therefore more truncated protein, highlighting the importance of misregulated post-  
304 transcriptional processes in DUX4-induced pathology.

## 305 **DISCUSSION**

306 We paired RNA-seq and Ribo-seq across a time course of DUX4 expression in MB135-iDUX4  
307 human skeletal muscle myoblasts, providing an integrative temporal view of the transcriptome  
308 and translome in a well-accepted cellular model of FSHD. Our choice to examine early time  
309 points, before overt DUX4-induced cytotoxicity, provides a view into early DUX4-driven  
310 regulation that builds on prior work at later time points (Bosnakovski et al., 2019; Chew et al.,  
311 2019; DeSimone, Leszyk, Wagner, & Emerson, 2019; Geng et al., 2012; Jagannathan et al.,  
312 2019; Jagannathan et al., 2016; Lek et al., 2020; Resnick et al., 2019; Shadle et al., 2019;  
313 Shadle et al., 2017; Sharma et al., 2013; Whiddon et al., 2017). Taken together, our results  
314 demonstrate that critical pathways underlying FSHD pathophysiology are perturbed earlier than  
315 previously understood and provide datasets that should serve as an informative resource for the  
316 FSHD community as it works to develop effective FSHD therapeutics.

317  
318 Our time course RNA-seq data revealed a large number of both up and downregulated genes  
319 after only 4 h of DUX4 expression. While the former result is expected given DUX4's role as a  
320 transcriptional activator (Geng et al., 2012), this degree of early gene silencing is remarkable  
321 and would require rapid cessation of transcription. There is no evidence that DUX4 acts as a  
322 direct repressor of transcription (Bosnakovski et al., 2018); therefore, our results suggest that  
323 there exists one or more unstudied DUX4-induced transcriptional repressors responsible for  
324 early gene downregulation. Indeed, of the 883 genes significantly upregulated by DUX4 at 4 h,  
325 28 are DNA-binding transcription factors known to effect gene repression and at least 5 more  
326 are DNA-binding proteins with an as-yet-undetermined role in gene regulation. This novel  
327 hypothesis provides a mechanism by which DUX4 inhibits gene expression that is unique from  
328 previously suggested models invoking competition of DUX4 with the homeodomain transcription  
329 factors PAX3 and PAX7 (C. R. S. Banerji et al., 2017; Bosnakovski, Daughters, Xu, Slack, &  
330 Kyba, 2009; Bosnakovski, Toso, et al., 2017; Bosnakovski et al., 2008) or transcriptional  
331 interference from DUX4-induced non-coding transcripts (Bosnakovski et al., 2018). Future work  
332 could determine which, if any, of the DNA-binding repressors induced by DUX4 cause early  
333 DUX4-mediated gene downregulation.

334  
335 The profound consequences of DUX4 misexpression on cell identity were also revealed in our  
336 time course RNA-seq results. GO analyses showed that DUX4-expressing myoblasts begin to  
337 turn on genes that promote cell proliferation and inhibit cell differentiation, and silence genes  
338 that promote myogenesis, early after DUX4 induction. Thus, skeletal muscle – a post-mitotic,

339 differentiated cell type – is pushed towards a proliferative, naïve embryonic state. This conflicted  
340 cell identity may contribute to apoptosis, as has been proposed before (Ashoti, Alemany, Sage,  
341 & Geijsen, 2021; Geng et al., 2012). Interestingly, a few hours after DUX4 begins forcing  
342 expression of an embryonic gene expression program, and just as overt apoptosis appears,  
343 cells respond by altering core regulatory processes such as RNA splicing and localization, and  
344 protein ubiquitination. Whether these changes underlie cellular “coping” mechanisms that delay  
345 death or underpin cytotoxicity remains to be determined.

346  
347 We recently described the DUX4-induced proteome using MB135-iDUX4 cells (Jagannathan et  
348 al., 2019). Although this catalog of expressed proteins remains incomplete due to partial  
349 coverage and restricted dynamic range inherent to mass spectrometry, our proteomics data  
350 demonstrated that hundreds of genes are post-transcriptionally modulated by DUX4. But, these  
351 experiments could not determine if this regulation was mediated at the level of protein synthesis  
352 or degradation. The time course Ribo-seq presented here complements and extends this earlier  
353 work, and suggests that most DUX4 post-transcriptional regulation, including of multiple key  
354 NMD factors, occurs via proteolysis. We did uncover a small number of genes regulated at the  
355 level of protein synthesis at the 14 h time point of DUX4 expression, likely representing the  
356 subset of transcripts impacted by eIF2 $\alpha$  phosphorylation induced by DUX4, as previously  
357 reported (Jagannathan et al., 2019; Shadle et al., 2017).

358  
359 Loss of NMD leads to the stabilization of aberrant RNAs (Kurosaki & Maquat, 2016). However,  
360 few studies have looked at whether aberrant RNAs are translated and what proteins they might  
361 produce. Here, we demonstrate that DUX4-induced NMD inhibition causes truncated protein  
362 production in muscle cells. The confirmed existence of truncated proteins in DUX4-expressing  
363 cells has implications for how we understand cytotoxicity. Protein truncation could result in a  
364 dominant negative function that inhibits the activity of the remaining, cell critical full-length  
365 protein. Truncated proteins might misfold and facilitate the formation of protein aggregates, such  
366 as those observed in FSHD myotubes (Homma, Beermann, Boyce, & Miller, 2015; Homma,  
367 Beermann, Yu, Boyce, & Miller, 2016; Shadle et al., 2017). Additionally, some DUX4-induced  
368 truncated proteins contain unique C-terminal extensions, or neo-peptides, that could serve as  
369 novel antigens and might induce inflammation in FSHD muscle. Importantly, we were able to  
370 detect truncated proteins in FSHD muscle cell cultures, thereby validating our findings from the  
371 inducible DUX4 system in a more physiological setting and raising the possibility that these  
372 molecules could be used clinically as functionally relevant and FSHD-specific biomarkers.

373 Future work is required to establish whether truncated proteins, either individually or in  
374 combination, contribute to cell death.

375

376 Many of the identified DUX4-induced truncated proteins are RBPs and splicing factors. It is well-  
377 established that DUX4 alters RNA splicing (Geng et al., 2012; Jagannathan et al., 2019;  
378 Jagannathan et al., 2016; Rickard et al., 2015) and therefore interesting to speculate that  
379 truncated RBPs and splicing proteins might be responsible for inducing global RNA processing  
380 defects. Such misprocessing would generate aberrant RNAs that could act to further overwhelm  
381 the already inhibited NMD pathway. As an example of this phenomenon, we observed that  
382 exogenous expression of the truncated splicing factor SRSF3-TR causes a significant increase  
383 in the level of the corresponding aberrant SRSF3 RNA. Splicing factors are known to regulate  
384 and coordinate their expression via various forms of autoregulation (Konigs et al., 2020; Leclair  
385 et al., 2020; Muller-McNicoll, Rossbach, Hui, & Medenbach, 2019). Overexpression of full-length  
386 SRSF3 leads to a reduction in the level of normal SRSF3 transcript while at the same time  
387 activating the production of aberrant SRSF3 RNA that gets degraded by NMD in a balancing act  
388 mechanism that prevents SRSF3 accumulation (Jumaa & Nielsen, 1997). Our results suggest  
389 that SRSF3-TR facilitates its own production and disrupts normal autoregulatory processes,  
390 leading to a new model in which DUX4-expressing cells hijack the splicing protein  
391 autoregulatory network and flip it – instead of acting to limit the production of full-length protein  
392 the creation of truncated protein is amplified.

393

394 In summary, our study provides a critical missing piece towards a comprehensive  
395 characterization of the major steps in DUX4-induced gene expression. We demonstrate that  
396 DUX4 induces cascading changes at all levels of gene regulation that are invisible at steady  
397 state, offering a glimpse into how developmentally regulated transcription factors expressed at  
398 the wrong time in the wrong context can wreak havoc leading to human disease.

399 **MATERIALS AND METHODS**

400

401 **RESOURCE AVAILABILITY**

402

403 **Lead contact**

404 Further information and requests for resources and reagents should be directed to and will be  
405 fulfilled by the lead contact, Sujatha Jagannathan ([sujatha.jagannathan@cuanschutz.edu](mailto:sujatha.jagannathan@cuanschutz.edu)).

406

407 **Materials availability**

408 The cell lines and antibody generated in this study are available upon request. Plasmids  
409 generated in this study have been deposited to Addgene (plasmid #171951, #171952, #172345,  
410 and #172346).

411

412 **Data and code availability**

413 The RNA-seq and Ribo-seq data generated during this study are available at GEO (accession  
414 number GSE178761). The code generated during this study are available at GitHub  
415 ([https://github.com/sjaganna/2021-campbell\\_dyle\\_calviello\\_et\\_al](https://github.com/sjaganna/2021-campbell_dyle_calviello_et_al)).

416

417 **EXPERIMENTAL MODEL AND SUBJECT DETAILS**

418

419 **Cell lines and culture conditions**

420 293T cells were obtained from ATCC (CRL-3216). MB135, MB135-iDUX4, MB135-  
421 iDUX4/ZSCAN4-mCherry, and MB200 immortalized human myoblasts were a gift from Dr.  
422 Stephen Tapscott and originated from the Fields Center for FSHD and Neuromuscular  
423 Research at the University of Rochester Medical Center. MB135-iDUX4 cells have been  
424 described previously (Jagannathan et al., 2016). MB135-iFLAG-SRSF3-FL, and MB135-iFLAG-  
425 SRSF3-TR immortalized human myoblasts were generated in this study. All parental cell lines  
426 were authenticated by karyotype analysis and determined to be free of mycoplasma by PCR  
427 screening. 293T cells were maintained in Dulbecco's Modified Eagle Medium (DMEM) (Thermo  
428 Fisher Scientific) supplemented with 10% EqualFETAL (Atlas Biologicals). Myoblasts were  
429 maintained in Ham's F-10 Nutrient Mix (Thermo Fisher Scientific) supplemented with 20% Fetal  
430 Bovine Serum (Thermo Fisher Scientific), 10 ng/mL recombinant human basic fibroblast growth  
431 factor (Promega), and 1  $\mu$ M dexamethasone (Sigma-Aldrich). MB135-iDUX4/ZSCAN4-mCherry  
432 and MB135-iDUX4 myoblasts were additionally maintained in 2  $\mu$ g/mL puromycin

433 dihydrochloride (VWR). MB135-iFLAG-SRSF3-FL and -TR myoblasts were additionally  
434 maintained in 10 µg/mL blasticidin S HCl (Thermo Fisher Scientific). Induction of DUX4 and  
435 SRSF3 transgenes was achieved by culturing cells in 1 µg/mL doxycycline hyclate (Sigma-  
436 Aldrich). Differentiation of myoblasts into myotubes was achieved by switching the fully  
437 confluent myoblast monolayer into DMEM containing 1% horse serum (Thermo Fisher  
438 Scientific) and Insulin-Transferrin-Selenium (Thermo Fisher Scientific). All cells were incubated  
439 at 37 °C with 5% CO<sub>2</sub>.

440

## 441 **METHOD DETAILS**

442

### 443 **Cloning**

444 pTwist-FLAG-SRSF3\_Full.Length\_Codon.Optimized and pTwist-FLAG-  
445 SRSF3\_Truncated\_Codon.Optimized plasmids were synthesized by Twist Bioscience. To  
446 construct pCW57.1-FLAG-SRSF3\_Full.Length\_Codon.Optimized-Blast and pCW57.1-FLAG-  
447 SRSF3\_Truncated\_Codon.Optimized-Blast plasmids, the SRSF3 open reading frames were  
448 subcloned into pCW57-MCS1-P2A-MCS2 (Blast) (a gift from Adam Karpf, Addgene plasmid  
449 #80921) (Barger, Branick, Chee, & Karpf, 2019) by restriction enzyme digest using EcoRI and  
450 BamHI (New England Biolabs).

451

### 452 **Antibody generation**

453 Purified SRSF3-TR peptide (Cys-PRRRVTIMSLLTTL) was used as an immunogen and  
454 polyclonal rabbit anti-SRSF3-TR antibody production was done in collaboration with Pacific  
455 Immunology (Ramona, CA). The antisera from all animals were screened for reactivity by ELISA  
456 against the immunogen and with western blots and immunofluorescence against transfected  
457 SRSF3-TR.

458

### 459 **Transgenic cell line generation**

460 Lentiviral particles expressing doxycycline-inducible FLAG-SRSF3-FL or -TR transgenes were  
461 generated by co-transfecting 293T cells with the appropriate lentivector, pMD2.G (a gift from  
462 Didier Trono, Addgene plasmid #12259), and psPAX2 (a gift from Didier Trono, Addgene  
463 plasmid #12260) using Lipofectamine 2000 Transfection Reagent (Thermo Fisher Scientific). To  
464 generate polyclonal SRSF3 transgenic cell lines, MB135 myoblasts were transduced with  
465 lentivirus in the presence of 8 µg/mL polybrene (Sigma-Aldrich) and selected using 10 µg/mL  
466 blasticidin S HCl.



467 **Plasmid transfections**

468 293T cells were transfected with pTwist-FLAG-SRSF3\_Full.Length\_Codon.Optimized and  
469 pTwist-FLAG-SRSF3\_Truncated\_Codon.Optimized plasmids using Lipofectamine 2000  
470 Transfection Reagent following the manufacturer's instructions.

471

472 **Live cell imaging**

473 MB135-iDUX4/ZSCAN4-mCherry myoblasts were induced with doxycycline hyclate to turn on  
474 DUX4 expression and subjected to time lapse imaging using the IncuCyte S3 incubator  
475 microscope system (Sartorius). Images were collected every 15 min from the time of  
476 doxycycline addition (t = 0 h) to 28 h.

477

478 **RNA extraction and RT-qPCR**

479 Total RNA was extracted from whole cells using TRIzol Reagent (Thermo Fisher Scientific)  
480 following the manufacturer's instructions. Isolated RNA was treated with DNase I (Thermo  
481 Fisher Scientific) and reverse transcribed to cDNA using SuperScript III reverse transcriptase  
482 (Thermo Fisher Scientific) and random hexamers (Thermo Fisher Scientific) according to the  
483 manufacturer's protocol. Quantitative PCR was carried out on a CFX384 Touch Real-Time PCR  
484 Detection System (Bio-Rad) using primers specific to each gene of interest and iTaq Universal  
485 SYBR Green Supermix (Bio-Rad). The expression levels of target genes were normalized to  
486 that of the reference gene *RPL27* using the delta-delta-Ct method (Livak & Schmittgen, 2001).  
487 The primers used in this study are listed in the Key Resources Table.

488

489 **RNA-seq library preparation and sequencing**

490 Total RNA was extracted from whole cells using TRIzol Reagent following the manufacturer's  
491 instructions. Isolated RNA was subjected to ribosomal RNA depletion using the Ribo-Zero rRNA  
492 Removal Kit (Illumina). RNA-seq libraries were prepared using the NEXTflex Rapid Directional  
493 qRNA-Seq Kit (Bio Scientific) following the manufacturer's instructions and sequenced using  
494 75 bp single-end sequencing on the Illumina NextSeq 500 platform by the BioFrontiers Institute  
495 Next-Gen Sequencing Core Facility.

496

497 **Ribosome footprinting**

498 Ribo-seq was performed as described previously (Calviello et al., 2020) using six 70% confluent  
499 10 cm dishes of MB135-iDUX4 cells per condition. Briefly, cells were washed with ice-cold  
500 phosphate-buffered saline (PBS) supplemented with 100 µg/mL cycloheximide (Sigma-Aldrich),

501 flash frozen on liquid nitrogen, and lysed in Lysis Buffer (PBS containing 1% (v/v) Triton X-100  
502 and 25 U/mL TurboDNase (Ambion)). Cells were harvested by scraping and further lysed by  
503 trituration ten times through a 26-gauge needle. The lysate was clarified by centrifugation at  
504 20,000 g for 10 min at 4 °C. The supernatants were flash frozen in liquid nitrogen and stored at -  
505 80 °C. Thawed lysates were treated with RNase I (Ambion) at 2.5 U/μL for 45 min at room  
506 temperature with gentle mixing. Further RNase activity was stopped by addition of SUPERaseIn  
507 RNase Inhibitor (Thermo Fisher Scientific). Next, ribosome complexes were enriched using  
508 MicroSpin S-400 HR Columns (GE Healthcare) and RNA extracted using the Direct-zol RNA  
509 Miniprep Kit (Zymo Research). Ribo-Zero rRNA Removal Kit was used to deplete rRNAs and  
510 the ribosome-protected fragments were recovered by running them in a 17% Urea gel, staining  
511 with SYBR Gold (Invitrogen), and extracting nucleic acids that are 27 to 30 nucleotides long  
512 from gel slices by constant agitation in 0.3 M NaCl at 4 °C overnight. The recovered nucleic  
513 acids were precipitated with isopropanol using GlycoBlue Coprecipitant (Ambion) as carrier and  
514 treated with T4 polynucleotide kinase (Thermo Fisher Scientific). Libraries were prepared using  
515 the NEXTflex Small RNA-Seq Kit v3 (Bioo Scientific) following the manufacturer's instructions  
516 and sequenced using 75 bp single-end reads on an Illumina NextSeq 500 by the BioFrontiers  
517 Institute Next-Gen Sequencing Core Facility.

518

### 519 **RNA-seq and Ribo-seq data analysis**

520 Fastq files were stripped of the adapter sequences using cutadapt. UMI sequences were  
521 removed, and reads were collapsed to fasta format. Reads were first aligned against rRNA  
522 (accession number U13369.1), and to a collection of snoRNAs, tRNAs, and miRNA (retrieved  
523 using the UCSC table browser) using bowtie2 (Langmead & Salzberg, 2012). Remaining reads  
524 were mapped to the hg38 version of the genome (without scaffolds) using STAR 2.6.0a (Dobin  
525 et al., 2013) supplied with the GENCODE 25 .gtf file. A maximum of two mismatches and  
526 mapping to a minimum of 50 positions was allowed. De-novo splice junction discovery was  
527 disabled for all datasets. Only the best alignment per each read was retained. Quality control  
528 and read counting of the Ribo-seq data was performed with Ribo-seQC (Calviello, Sydow,  
529 Harnett, & Ohler, 2019).

530

531 Differential gene expression analysis of the RNA-seq data was conducted using DESeq2 (Love,  
532 Huber, & Anders, 2014). Briefly, featureCounts from the subread R package (Liao, Smyth, &  
533 Shi, 2014) was used to assign aligned reads (in BAM format) to genomic features supplied with  
534 the GENCODE 25. gtf file. The featureCounts output was then supplied to DESeq2 and

535 differential expression analysis was conducted with the 0 h time point serving as the reference  
536 sample. Genes with very low read count were filtered out by requiring at least a total of 10 reads  
537 across the 12 samples (3 replicates each of the 0, 4, 8, and 14 h samples). Log<sub>2</sub> fold change  
538 shrinkage was done using the apeglm function (Zhu, Ibrahim, & Love, 2019).

539

540 Differential analysis of the RNA-seq and Ribo-seq data was performed using DESeq2, as  
541 previously described (Calviello et al., 2021; Chothani et al., 2019), using an interaction model  
542 between the tested condition and RNA-seq – Ribo-seq counts. Only reads mapping uniquely to  
543 coding sequence regions were used. In addition, ORFquant (Calviello et al., 2020) was used to  
544 derive de-novo isoform-specific translation events, by pooling the Ribo-seQC output from all  
545 Ribo-seq samples, using uniquely mapping reads. DEXSeq (Anders et al., 2012) was used to  
546 perform differential exon usage along the DUX4 time course data, using Ribo-seq counts on  
547 exonic bins and junctions belonging to different ORFquant-derived translated regions. NMD  
548 candidates were defined by ORFquant as open reading frames ending with a stop codon  
549 upstream of an exon-exon junction.

550

#### 551 **GO category analysis**

552 Gene Ontology (GO) analysis was conducted using the web tool <http://geneontology.org>,  
553 powered by pantherdb.org. Briefly, statistical overrepresentation test using the complete GO  
554 biological process annotation dataset was conducted and p-values were calculated using the  
555 Fisher's exact test and False Discovery Rate was calculated by the Benjamini-Hochberg  
556 procedure.

557

#### 558 **Polysome profiling**

559 Polysome profiling was performed as previously described (Merrick & Hensold, 2001; Miura,  
560 Andrews, Holcik, & Jasmin, 2008) with the following modifications. Four 70% confluent 15 cm  
561 dishes of MB135-iDUX4 cells per condition were treated with 100 µg/mL cycloheximide for 10  
562 min, transferred to wet ice, washed with ice-cold PBS containing 100 µg/mL cycloheximide, and  
563 then lysed in 400 µL Lysis Buffer (20 mM HEPES pH 7.4, 15 mM MgCl<sub>2</sub>, 200 mM NaCl, 1%  
564 Triton X-100, 100 µg/mL cycloheximide, 2 mM DTT, and 100 U/mL SUPERaseIn RNase  
565 Inhibitor) per 15 cm dish. The cells and buffer were scraped off the dish and centrifuged at  
566 13,000 rpm for 10 min at 4 °C. Lysates were fractionated on a 10% to 60% sucrose gradient  
567 using the SW 41 Ti Swinging-Bucket Rotor (Beckman Coulter) at 36,000 rpm for 3 h and 10  
568 min. Twenty-four fractions were collected using a Gradient Station ip (BioComp) and an FC

569 203B Fraction Collector (Gilson) with continuous monitoring of absorbance at 254 nm. RNA  
570 from each fraction was extracted using TRIzol LS Reagent (Thermo Fisher Scientific) following  
571 the manufacturer's instructions. RT-qPCR was carried out as described above.

572

### 573 **Protein extraction**

574 Total protein was extracted from whole cells using TRIzol Reagent following the manufacturer's  
575 instructions, excepting that protein pellets were dissolved in Protein Resuspension Buffer (0.5 M  
576 Tris base, 5% SDS). Isolated protein was quantified using the Pierce BCA Protein Assay Kit  
577 (Thermo Fisher Scientific) according to the manufacturer's protocol. Protein was mixed with 4X  
578 NuPAGE LDS Sample Buffer (Thermo Fisher Scientific) containing 50 mM DTT and heated to  
579 70 °C before immunoblotting.

580

### 581 **Immunoprecipitation**

582 MB135-iDUX4 myoblasts were treated with or without doxycycline for 14 h and then trypsinized  
583 prior to lysis on ice in 1 mL of Lysis Buffer (50 mM Tris-HCl pH 7.5, 150 mM NaCl, 1% NP-40)  
584 containing protease inhibitors (Sigma Aldrich). Lysates were precleared using Protein G  
585 Sepharose (Thermo Fisher Scientific) for 1 h prior to an overnight incubation at 4 °C with either  
586 anti-SRSF3 or anti-SRSF3-TR antibody. Protein G Sepharose was added the following morning  
587 for 5 h to bind the antibody, and beads were subsequently washed 5 times with 1 mL cold Lysis  
588 Buffer. After the final wash, 4X NuPAGE LDS Sample Buffer containing 50 mM DTT was added  
589 directly to the beads and samples heated to 70 °C for protein elution before immunoblotting.

590

### 591 **Immunoblotting**

592 Protein was run on NuPAGE Bis-Tris precast polyacrylamide gels (Thermo Fisher Scientific)  
593 alongside PageRuler Plus Prestained Protein Ladder (Thermo Fisher Scientific) and transferred  
594 to Odyssey nitrocellulose membrane (LI-COR Biosciences). Membranes were blocked in  
595 Intercept (PBS) Blocking Buffer (LI-COR Biosciences) before overnight incubation at 4 °C with  
596 primary antibodies diluted in Blocking Buffer containing 0.2% Tween 20. Membranes were  
597 incubated with IRDye-conjugated secondary antibodies (LI-COR Biosciences) for 1 h and  
598 fluorescent signal visualized using a Sapphire Biomolecular Imager (Azure Biosystems) and  
599 Sapphire Capture software (Azure Biosystems). When appropriate, membranes were stripped  
600 with Restore Western Blot Stripping Buffer (Thermo Fisher Scientific) before being re-probed.  
601 Band intensities were quantified by densitometry using ImageJ (Schneider, Rasband, & Eliceiri,  
602 2012).

603 **Immunofluorescence**

604 Cells were fixed in 10% Neutral Buffered Formalin (Research Products International) for 30 min  
605 and permeabilized for 10 min in PBS with 0.1% Triton X-100. Samples were then incubated  
606 overnight at 4 °C with primary antibodies, followed by incubation with 488- or 594-conjugated  
607 secondary antibodies for 1 h prior to counterstaining and mounting with Prolong Diamond  
608 Antifade Mountant with DAPI (Thermo Fisher Scientific). Slides were imaged with a DeltaVision  
609 Elite deconvolution microscope, CoolSNAP HQ<sup>2</sup> high-resolution CCD camera, and Resolve3D  
610 softWoRx-Acquire v7.0 software. Image J software (Schneider et al., 2012) was used for image  
611 analysis.

612

613 **Antibodies**

614 The antibodies used in this study are anti-DUX4 (Abcam 124699), anti-Histone H3 (Abcam  
615 1791), anti-SRSF3 (Thermo Fisher Scientific 33-4200), anti-SRSF3-TR (this paper), anti-  
616 RENT1/hUPF1 (Abcam ab109363), Drop-n-Stain CF 488A Donkey Anti-Rabbit IgG (Biotium  
617 20950), Drop-n-Stain CF 594 Donkey Anti-Rabbit IgG (Biotium 20951), IRDye 650 Goat anti-  
618 Mouse IgG Secondary Antibody (LI-COR Biosciences 926-65010), and IRDye 800CW Goat  
619 anti-Rabbit IgG Secondary Antibody (LI-COR Biosciences 926-32211).

620

621 **QUANTIFICATION AND STATISTICAL ANALYSIS**

622

623 **Data analysis, statistical tests, and visualization**

624 All data analysis and statistical tests were performed in the R programming environment and  
625 relied on Bioconductor (Huber et al., 2015) and ggplot2 (Wickham, 2016). Plots were generated  
626 using R plotting functions and/or the ggplot2 package. Bar and line graphs were generated  
627 using GraphPad Prism software version 9.0. Biological replicates were defined as experiments  
628 performed separately on distinct samples (i.e. cells cultured in different wells) representing  
629 identical conditions and/or time points. No outliers were eliminated in this study. All statistical  
630 tests were performed using R functions.

631 **ACKNOWLEDGEMENTS**

632 We thank Stephen Tapscott for the MB135-iDUX4/ZSCAN4-mCherry cell line. We thank Jeffrey  
633 Kieft for his guidance in carrying out polysome profiling. We thank Neelanjan Mukherjee, Olivia  
634 Rissland, Srinivas Ramachandran, and all members of the Jagannathan laboratory for insightful  
635 manuscript feedback. We thank the BioFrontiers Institute Next-Gen Sequencing Core Facility,  
636 which performed the Illumina sequencing and library construction. This work was supported by  
637 the RNA Bioscience Initiative, University of Colorado Anschutz Medical Campus (S.J.), Friends  
638 of FSH Research and The Chris Carrino Foundation for FSHD AWD-194864 (S.J.), the FSHD  
639 Society FSHS-82018-01 (A.E.C. and M.D.), the California Tobacco-Related Disease Research  
640 Grants Program 27KT-0003 (S.N.F.), and the National Institutes of Health DP2GM132932  
641 (S.N.F.).

642

643 **AUTHOR CONTRIBUTIONS**

644 A.E.C., M.C.D., and S.J. conceived and designed the study. A.E.C, M.C.D., M.A.C., and T.F.  
645 performed experiments. A.E.C., L.C., T.M., R.F., A.E.G., S.N.F., and S.J. analyzed data. A.E.C.  
646 and S.J. wrote the paper with input from all authors.

647

648 **DECLARATION OF INTERESTS**

649 The authors declare no competing interests.



650 SUPPLEMENTAL FILES

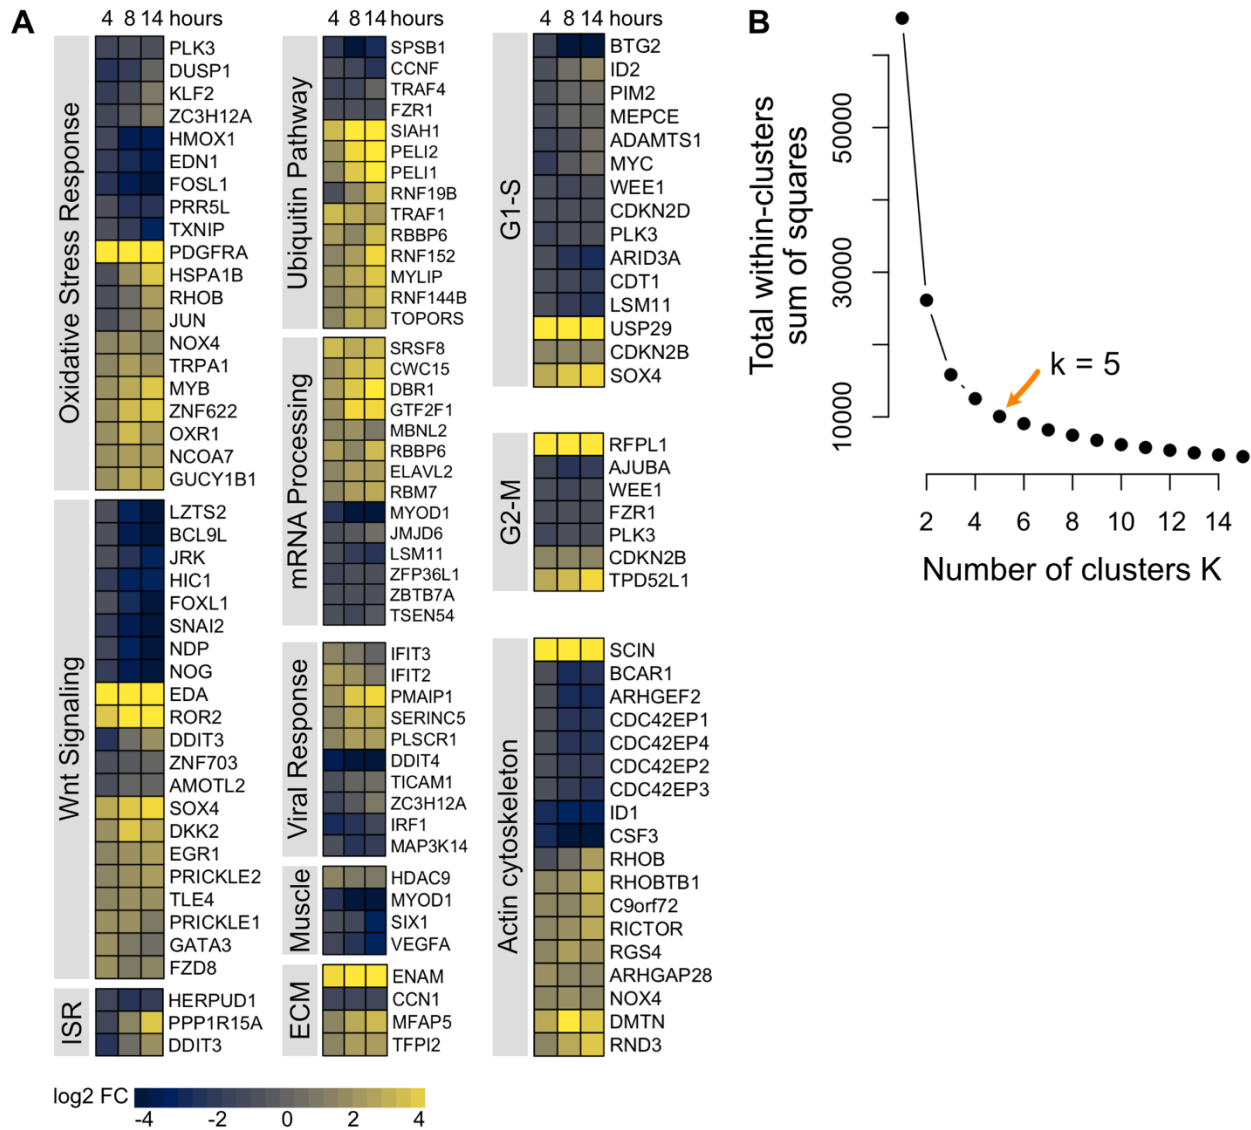

**Figure 2 – figure supplement 1. Gene-level analysis of early changes in pathways impacted by DUX4. (A)** Heat maps of transcript-level changes in genes that belong to various biological pathways known to be misregulated by DUX4, as defined by the Gene Ontology Biological Process classification system accessed through GSEA/MSigDB database. The subset of genes that showed significant change in expression at the 4 h time point of DUX4 induction are plotted. **(B)** Elbow method analysis was used to determine appropriate cluster number for Figure 2C-E.

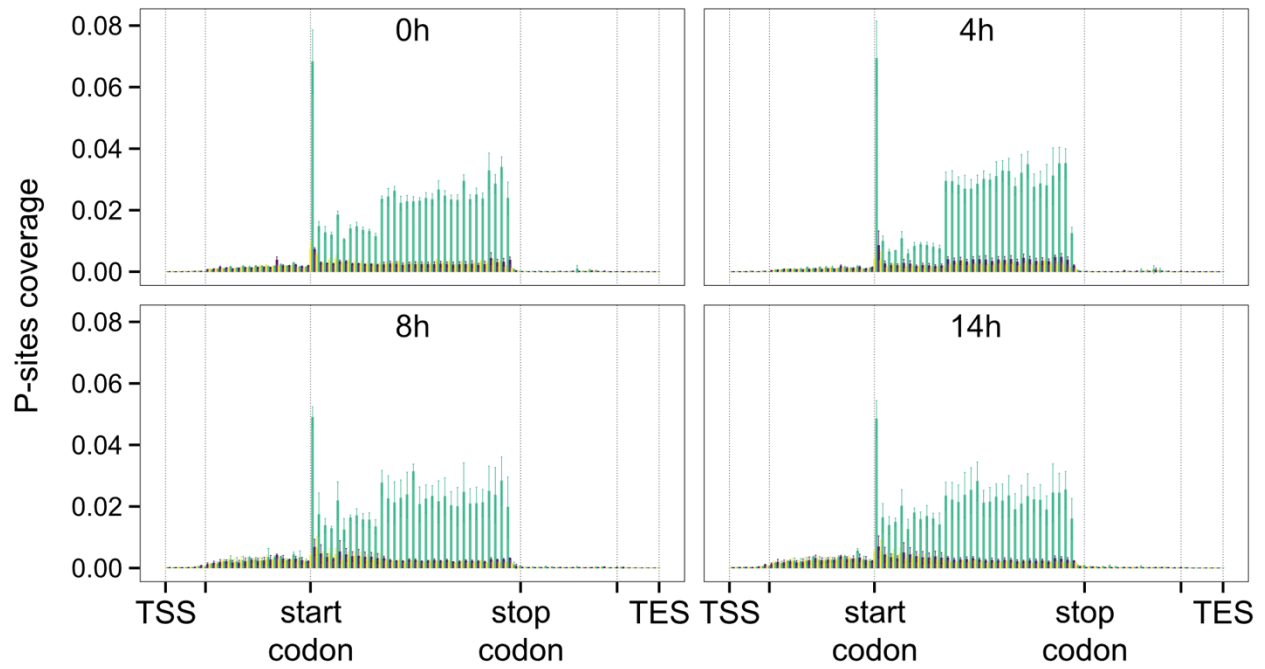

**Figure 3 – figure supplement 1. Ribo-seq quality control.** Aggregate profile of P-sites coverage (as calculated by Ribo-seQC) depicting single nucleotide resolution of Ribo-seq data along the time course. Each frame is shown with a different color. Error bars represent the standard deviation from three biological replicates.

651 **Video 1. Time course imaging following DUX4 expression.**

652 Live cell fluorescence microscopy recording of MB135-iDUX4/ZSCAN4-mCherry myoblasts  
653 treated with doxycycline to induce DUX4 expression.

654

655 **Supplementary Table 1.**

656 DESeq2 differential gene expression analysis results for DUX4 time course RNA-seq data at 4,  
657 8, or 14 h post-induction compared to 0 h (control).

658

659 **Supplementary Table 2.**

660 Cluster analysis of RNA-seq log2 fold change at 4, 8, or 14 h of DUX4 induction compared to 0  
661 h (control); and Gene Ontology analysis of genes within each cluster.

662

663 **Supplementary Table 3.**

664 ORFquant analysis results for DUX4 time course RNA-seq and Ribo-seq data at 4, 8, or 14 h  
665 post-induction compared to 0 h (control); and Gene Ontology analysis of genes with  
666 downregulated ribosome density at 14 h.

667

668 **Supplementary Table 4.**

669 DEXSeq analysis results for DUX4 time course Ribo-seq data at 4, 8, or 14 h post-induction  
670 compared to 0 h (control); and Gene Ontology analysis of NMD targets upregulated at 14 h.

671 **REFERENCES**

672

673 Anders, S., Reyes, A., & Huber, W. (2012). Detecting differential usage of exons from RNA-seq  
674 data. *Genome Res*, 22(10), 2008-2017. doi:10.1101/gr.133744.111

675 Ashoti, A., Alemany, A., Sage, F., & Geijsen, N. (2021). DUX4 induces a homogeneous  
676 sequence of molecular changes, culminating in the activation of a stem-cell-like transcriptional  
677 network and induction of apoptosis in somatic cells. *bioRxiv*. doi:10.1101/2021.05.04.442407

678 Banerji, C. R., Knopp, P., Moyle, L. A., Severini, S., Orrell, R. W., Teschendorff, A. E., &  
679 Zammit, P. S. (2015). beta-Catenin is central to DUX4-driven network rewiring in  
680 facioscapulohumeral muscular dystrophy. *J R Soc Interface*, 12(102), 20140797.  
681 doi:10.1098/rsif.2014.0797

682 Banerji, C. R. S., Panamarova, M., Hebaishi, H., White, R. B., Relaix, F., Severini, S., & Zammit,  
683 P. S. (2017). PAX7 target genes are globally repressed in facioscapulohumeral muscular  
684 dystrophy skeletal muscle. *Nat Commun*, 8(1), 2152. doi:10.1038/s41467-017-01200-4

685 Barger, C. J., Branick, C., Chee, L., & Karpf, A. R. (2019). Pan-Cancer Analyses Reveal  
686 Genomic Features of FOXM1 Overexpression in Cancer. *Cancers (Basel)*, 11(2).  
687 doi:10.3390/cancers11020251

688 Bosnakovski, D., Chan, S. S. K., Recht, O. O., Hartweck, L. M., Gustafson, C. J., Athman, L. L.,  
689 . . . Kyba, M. (2017). Muscle pathology from stochastic low level DUX4 expression in an FSHD  
690 mouse model. *Nat Commun*, 8(1), 550. doi:10.1038/s41467-017-00730-1

691 Bosnakovski, D., da Silva, M. T., Sunny, S. T., Ener, E. T., Toso, E. A., Yuan, C., . . . Kyba, M.  
692 (2019). A novel P300 inhibitor reverses DUX4-mediated global histone H3 hyperacetylation,  
693 target gene expression, and cell death. *Sci Adv*, 5(9), eaaw7781. doi:10.1126/sciadv.aaw7781

694 Bosnakovski, D., Daughters, R. S., Xu, Z., Slack, J. M., & Kyba, M. (2009). Biphasic myopathic  
695 phenotype of mouse DUX, an ORF within conserved FSHD-related repeats. *PLoS One*, 4(9),  
696 e7003. doi:10.1371/journal.pone.0007003

- 697 Bosnakovski, D., Gearhart, M. D., Toso, E. A., Ener, E. T., Choi, S. H., & Kyba, M. (2018). Low  
698 level DUX4 expression disrupts myogenesis through deregulation of myogenic gene expression.  
699 *Sci Rep*, 8(1), 16957. doi:10.1038/s41598-018-35150-8
- 700 Bosnakovski, D., Toso, E. A., Hartweck, L. M., Magli, A., Lee, H. A., Thompson, E. R., . . . Kyba,  
701 M. (2017). The DUX4 homeodomains mediate inhibition of myogenesis and are functionally  
702 exchangeable with the Pax7 homeodomain. *J Cell Sci*, 130(21), 3685-3697.  
703 doi:10.1242/jcs.205427
- 704 Bosnakovski, D., Xu, Z., Gang, E. J., Galindo, C. L., Liu, M., Simsek, T., . . . Kyba, M. (2008).  
705 An isogenetic myoblast expression screen identifies DUX4-mediated FSHD-associated  
706 molecular pathologies. *EMBO J*, 27(20), 2766-2779. doi:10.1038/emboj.2008.201
- 707 Calviello, L., Hirsekorn, A., & Ohler, U. (2020). Quantification of translation uncovers the  
708 functions of the alternative transcriptome. *Nat Struct Mol Biol*, 27(8), 717-725.  
709 doi:10.1038/s41594-020-0450-4
- 710 Calviello, L., Sydow, D., Harnett, D., & Ohler, U. (2019). Ribo-seQC: comprehensive analysis of  
711 cytoplasmic and organellar ribosome profiling data. *bioRxiv*. doi:10.1101/601468
- 712 Calviello, L., Venkataramanan, S., Rogowski, K. J., Wyler, E., Wilkins, K., Tejura, M., . . . Floor,  
713 S. N. (2021). DDX3 depletion represses translation of mRNAs with complex 5' UTRs. *Nucleic  
714 Acids Res*, 49(9), 5336-5350. doi:10.1093/nar/gkab287
- 715 Campbell, A. E., Belleville, A. E., Resnick, R., Shadle, S. C., & Tapscott, S. J. (2018).  
716 Facioscapulohumeral dystrophy: activating an early embryonic transcriptional program in human  
717 skeletal muscle. *Hum Mol Genet*, 27(R2), R153-R162. doi:10.1093/hmg/ddy162
- 718 Chew, G. L., Campbell, A. E., De Neef, E., Sutliff, N. A., Shadle, S. C., Tapscott, S. J., &  
719 Bradley, R. K. (2019). DUX4 Suppresses MHC Class I to Promote Cancer Immune Evasion and  
720 Resistance to Checkpoint Blockade. *Dev Cell*, 50(5), 658-671 e657.  
721 doi:10.1016/j.devcel.2019.06.011

- 722 Chothani, S., Adami, E., Ouyang, J. F., Viswanathan, S., Hubner, N., Cook, S. A., . . . Rackham,  
723 O. J. L. (2019). deltaTE: Detection of Translationally Regulated Genes by Integrative Analysis of  
724 Ribo-seq and RNA-seq Data. *Curr Protoc Mol Biol*, 129(1), e108. doi:10.1002/cpmb.108
- 725 Dandapat, A., Bosnakovski, D., Hartweck, L. M., Arpke, R. W., Baltgalvis, K. A., Vang, D., . . .  
726 Kyba, M. (2014). Dominant lethal pathologies in male mice engineered to contain an X-linked  
727 DUX4 transgene. *Cell Rep*, 8(5), 1484-1496. doi:10.1016/j.celrep.2014.07.056
- 728 DeSimone, A. M., Leszyk, J., Wagner, K., & Emerson, C. P., Jr. (2019). Identification of the  
729 hyaluronic acid pathway as a therapeutic target for facioscapulohumeral muscular dystrophy.  
730 *Sci Adv*, 5(12), eaaw7099. doi:10.1126/sciadv.aaw7099
- 731 Dobin, A., Davis, C. A., Schlesinger, F., Drenkow, J., Zaleski, C., Jha, S., . . . Gingeras, T. R.  
732 (2013). STAR: ultrafast universal RNA-seq aligner. *Bioinformatics*, 29(1), 15-21.  
733 doi:10.1093/bioinformatics/bts635
- 734 Feng, Q., Snider, L., Jagannathan, S., Tawil, R., van der Maarel, S. M., Tapscott, S. J., &  
735 Bradley, R. K. (2015). A feedback loop between nonsense-mediated decay and the retrogene  
736 DUX4 in facioscapulohumeral muscular dystrophy. *Elife*, 4. doi:10.7554/eLife.04996
- 737 Geng, L. N., Yao, Z., Snider, L., Fong, A. P., Cech, J. N., Young, J. M., . . . Tapscott, S. J.  
738 (2012). DUX4 activates germline genes, retroelements, and immune mediators: implications for  
739 facioscapulohumeral dystrophy. *Dev Cell*, 22(1), 38-51. doi:10.1016/j.devcel.2011.11.013
- 740 Hamel, J., & Tawil, R. (2018). Facioscapulohumeral Muscular Dystrophy: Update on  
741 Pathogenesis and Future Treatments. *Neurotherapeutics*, 15(4), 863-871. doi:10.1007/s13311-  
742 018-00675-3
- 743 Homma, S., Beermann, M. L., Boyce, F. M., & Miller, J. B. (2015). Expression of FSHD-related  
744 DUX4-FL alters proteostasis and induces TDP-43 aggregation. *Ann Clin Transl Neurol*, 2(2),  
745 151-166. doi:10.1002/acn3.158



- 746 Homma, S., Beermann, M. L., Yu, B., Boyce, F. M., & Miller, J. B. (2016). Nuclear bodies  
747 reorganize during myogenesis in vitro and are differentially disrupted by expression of FSHD-  
748 associated DUX4. *Skelet Muscle*, 6(1), 42. doi:10.1186/s13395-016-0113-7
- 749 Huber, W., Carey, V. J., Gentleman, R., Anders, S., Carlson, M., Carvalho, B. S., . . . Morgan,  
750 M. (2015). Orchestrating high-throughput genomic analysis with Bioconductor. *Nat Methods*,  
751 12(2), 115-121. doi:10.1038/nmeth.3252
- 752 Ingolia, N. T. (2014). Ribosome profiling: new views of translation, from single codons to  
753 genome scale. *Nat Rev Genet*, 15(3), 205-213. doi:10.1038/nrg3645
- 754 Jagannathan, S., Ogata, Y., Gafken, P. R., Tapscott, S. J., & Bradley, R. K. (2019). Quantitative  
755 proteomics reveals key roles for post-transcriptional gene regulation in the molecular pathology  
756 of facioscapulohumeral muscular dystrophy. *Elife*, 8. doi:10.7554/eLife.41740
- 757 Jagannathan, S., Shadle, S. C., Resnick, R., Snider, L., Tawil, R. N., van der Maarel, S. M., . . .  
758 Tapscott, S. J. (2016). Model systems of DUX4 expression recapitulate the transcriptional  
759 profile of FSHD cells. *Hum Mol Genet*, 25(20), 4419-4431. doi:10.1093/hmg/ddw271
- 760 Jumaa, H., & Nielsen, P. J. (1997). The splicing factor SRp20 modifies splicing of its own mRNA  
761 and ASF/SF2 antagonizes this regulation. *EMBO J*, 16(16), 5077-5085.  
762 doi:10.1093/emboj/16.16.5077
- 763 Konigs, V., de Oliveira Freitas Machado, C., Arnold, B., Blumel, N., Solovyeva, A., Lobbert, S., .  
764 . . Muller-McNicoll, M. (2020). SRSF7 maintains its homeostasis through the expression of Split-  
765 ORFs and nuclear body assembly. *Nat Struct Mol Biol*, 27(3), 260-273. doi:10.1038/s41594-  
766 020-0385-9
- 767 Kowaljow, V., Marcowycz, A., Anseau, E., Conde, C. B., Sauvage, S., Matteotti, C., . . . Rosa,  
768 A. L. (2007). The DUX4 gene at the FSHD1A locus encodes a pro-apoptotic protein.  
769 *Neuromuscul Disord*, 17(8), 611-623. doi:10.1016/j.nmd.2007.04.002
- 770 Kurosaki, T., & Maquat, L. E. (2016). Nonsense-mediated mRNA decay in humans at a glance.  
771 *J Cell Sci*, 129(3), 461-467. doi:10.1242/jcs.181008

- 772 Langmead, B., & Salzberg, S. L. (2012). Fast gapped-read alignment with Bowtie 2. *Nat*  
773 *Methods*, 9(4), 357-359. doi:10.1038/nmeth.1923
- 774 Leclair, N. K., Brugiolo, M., Urbanski, L., Lawson, S. C., Thakar, K., Yurieva, M., . . . Anczukow,  
775 O. (2020). Poison Exon Splicing Regulates a Coordinated Network of SR Protein Expression  
776 during Differentiation and Tumorigenesis. *Mol Cell*, 80(4), 648-665 e649.  
777 doi:10.1016/j.molcel.2020.10.019
- 778 Lek, A., Zhang, Y., Woodman, K. G., Huang, S., DeSimone, A. M., Cohen, J., . . . Kunkel, L. M.  
779 (2020). Applying genome-wide CRISPR-Cas9 screens for therapeutic discovery in  
780 facioscapulohumeral muscular dystrophy. *Sci Transl Med*, 12(536).  
781 doi:10.1126/scitranslmed.aay0271
- 782 Lemmers, R. J., van der Vliet, P. J., Klooster, R., Sacconi, S., Camano, P., Dauwerse, J. G., . . .  
783 van der Maarel, S. M. (2010). A unifying genetic model for facioscapulohumeral muscular  
784 dystrophy. *Science*, 329(5999), 1650-1653. doi:10.1126/science.1189044
- 785 Liao, Y., Smyth, G. K., & Shi, W. (2014). featureCounts: an efficient general purpose program  
786 for assigning sequence reads to genomic features. *Bioinformatics*, 30(7), 923-930.  
787 doi:10.1093/bioinformatics/btt656
- 788 Lim, K. R. Q., Nguyen, Q., & Yokota, T. (2020). DUX4 Signalling in the Pathogenesis of  
789 Facioscapulohumeral Muscular Dystrophy. *Int J Mol Sci*, 21(3). doi:10.3390/ijms21030729
- 790 Lin, J. H., Li, H., Yasumura, D., Cohen, H. R., Zhang, C., Panning, B., . . . Walter, P. (2007).  
791 IRE1 signaling affects cell fate during the unfolded protein response. *Science*, 318(5852), 944-  
792 949. doi:10.1126/science.1146361
- 793 Livak, K. J., & Schmittgen, T. D. (2001). Analysis of relative gene expression data using real-  
794 time quantitative PCR and the 2<sup>-</sup>(Delta Delta C(T)) Method. *Methods*, 25(4), 402-408.  
795 doi:10.1006/meth.2001.1262

- 796 Love, M. I., Huber, W., & Anders, S. (2014). Moderated estimation of fold change and  
797 dispersion for RNA-seq data with DESeq2. *Genome Biol*, 15(12), 550. doi:10.1186/s13059-014-  
798 0550-8
- 799 Merrick, W. C., & Hensold, J. O. (2001). Analysis of eukaryotic translation in purified and  
800 semipurified systems. *Curr Protoc Cell Biol*, Chapter 11, Unit 11 19.  
801 doi:10.1002/0471143030.cb1109s08
- 802 Miura, P., Andrews, M., Holcik, M., & Jasmin, B. J. (2008). IRES-mediated translation of  
803 utrophin A is enhanced by glucocorticoid treatment in skeletal muscle cells. *PLoS One*, 3(6),  
804 e2309. doi:10.1371/journal.pone.0002309
- 805 More, D. A., & Kumar, A. (2020). SRSF3: Newly discovered functions and roles in human health  
806 and diseases. *Eur J Cell Biol*, 99(6), 151099. doi:10.1016/j.ejcb.2020.151099
- 807 Muller-McNicoll, M., Rossbach, O., Hui, J., & Medenbach, J. (2019). Auto-regulatory feedback  
808 by RNA-binding proteins. *J Mol Cell Biol*, 11(10), 930-939. doi:10.1093/jmcb/mjz043
- 809 Proud, C. G. (2005). eIF2 and the control of cell physiology. *Semin Cell Dev Biol*, 16(1), 3-12.  
810 doi:10.1016/j.semcdb.2004.11.004
- 811 Resnick, R., Wong, C. J., Hamm, D. C., Bennett, S. R., Skene, P. J., Hake, S. B., . . . Tapscott,  
812 S. J. (2019). DUX4-Induced Histone Variants H3.X and H3.Y Mark DUX4 Target Genes for  
813 Expression. *Cell Rep*, 29(7), 1812-1820 e1815. doi:10.1016/j.celrep.2019.10.025
- 814 Rickard, A. M., Petek, L. M., & Miller, D. G. (2015). Endogenous DUX4 expression in FSHD  
815 myotubes is sufficient to cause cell death and disrupts RNA splicing and cell migration  
816 pathways. *Hum Mol Genet*, 24(20), 5901-5914. doi:10.1093/hmg/ddv315
- 817 Schneider, C. A., Rasband, W. S., & Eliceiri, K. W. (2012). NIH Image to ImageJ: 25 years of  
818 image analysis. *Nat Methods*, 9(7), 671-675. doi:10.1038/nmeth.2089
- 819 Shadle, S. C., Bennett, S. R., Wong, C. J., Karreman, N. A., Campbell, A. E., van der Maarel, S.  
820 M., . . . Tapscott, S. J. (2019). DUX4-induced bidirectional HSATII satellite repeat transcripts

- 821 form intranuclear double-stranded RNA foci in human cell models of FSHD. *Hum Mol Genet*,  
822 28(23), 3997-4011. doi:10.1093/hmg/ddz242
- 823 Shadle, S. C., Zhong, J. W., Campbell, A. E., Conerly, M. L., Jagannathan, S., Wong, C. J., . . .  
824 Tapscott, S. J. (2017). DUX4-induced dsRNA and MYC mRNA stabilization activate apoptotic  
825 pathways in human cell models of facioscapulohumeral dystrophy. *PLoS Genet*, 13(3),  
826 e1006658. doi:10.1371/journal.pgen.1006658
- 827 Sharma, V., Harafuji, N., Belayew, A., & Chen, Y. W. (2013). DUX4 differentially regulates  
828 transcriptomes of human rhabdomyosarcoma and mouse C2C12 cells. *PLoS One*, 8(5),  
829 e64691. doi:10.1371/journal.pone.0064691
- 830 Tawil, R., van der Maarel, S. M., & Tapscott, S. J. (2014). Facioscapulohumeral dystrophy: the  
831 path to consensus on pathophysiology. *Skelet Muscle*, 4, 12. doi:10.1186/2044-5040-4-12
- 832 Wallace, L. M., Garwick, S. E., Mei, W., Belayew, A., Coppee, F., Ladner, K. J., . . . Harper, S.  
833 Q. (2011). DUX4, a candidate gene for facioscapulohumeral muscular dystrophy, causes p53-  
834 dependent myopathy in vivo. *Ann Neurol*, 69(3), 540-552. doi:10.1002/ana.22275
- 835 Whiddon, J. L., Langford, A. T., Wong, C. J., Zhong, J. W., & Tapscott, S. J. (2017).  
836 Conservation and innovation in the DUX4-family gene network. *Nat Genet*, 49(6), 935-940.  
837 doi:10.1038/ng.3846
- 838 Wickham, H. (2016). *ggplot2: Elegant Graphics for Data Analysis*. New York, NY: Springer-  
839 Verlag.
- 840 Yao, Z., Snider, L., Balog, J., Lemmers, R. J., Van Der Maarel, S. M., Tawil, R., & Tapscott, S.  
841 J. (2014). DUX4-induced gene expression is the major molecular signature in FSHD skeletal  
842 muscle. *Hum Mol Genet*, 23(20), 5342-5352. doi:10.1093/hmg/ddu251
- 843 Zeisel, A., Yitzhaky, A., Bossel Ben-Moshe, N., & Domany, E. (2013). An accessible database  
844 for mouse and human whole transcriptome qPCR primers. *Bioinformatics*, 29(10), 1355-1356.  
845 doi:10.1093/bioinformatics/btt145

846 Zhou, Z., Gong, Q., Lin, Z., Wang, Y., Li, M., Wang, L., . . . Li, P. (2020). Emerging Roles of  
847 SRSF3 as a Therapeutic Target for Cancer. *Front Oncol*, *10*, 577636.  
848 doi:10.3389/fonc.2020.577636

849 Zhu, A., Ibrahim, J. G., & Love, M. I. (2019). Heavy-tailed prior distributions for sequence count  
850 data: removing the noise and preserving large differences. *Bioinformatics*, *35*(12), 2084-2092.  
851 doi:10.1093/bioinformatics/bty895

852 **APPENDIX**

853

854 **KEY RESOURCES TABLE**

| Reagent type (species) or resource | Designation                         | Source or reference        | Identifiers                    | Additional information                                                                |
|------------------------------------|-------------------------------------|----------------------------|--------------------------------|---------------------------------------------------------------------------------------|
| cell line ( <i>Homo sapiens</i> )  | 293T                                | ATCC                       | Cat# CRL-3216, RRID:CVCL_0063  |                                                                                       |
| cell line ( <i>H. sapiens</i> )    | MB135                               | Stephen Tapscott           |                                | Female control myoblast line                                                          |
| cell line ( <i>H. sapiens</i> )    | MB135-iDUX4                         | (Jagannathan et al., 2016) |                                | Harbors doxycycline-inducible DUX4 transgene                                          |
| cell line ( <i>H. sapiens</i> )    | MB135-iDUX4/ZSCAN4-mCherry          | Stephen Tapscott           |                                | Harbors doxycycline-inducible DUX4 transgene and DUX4-responsive fluorescent reporter |
| cell line ( <i>H. sapiens</i> )    | MB135-iFLAG-SRSF3-FL                | This paper                 |                                | Harbors doxycycline-inducible, FLAG-tagged, codon-optimized, full-length SRSF3        |
| cell line ( <i>H. sapiens</i> )    | MB135-iFLAG-SRSF3-TR                | This paper                 |                                | Harbors doxycycline-inducible, FLAG-tagged, codon-optimized, truncated SRSF3          |
| cell line ( <i>H. sapiens</i> )    | MB200                               | Stephen Tapscott           |                                | Male FSHD myoblast line                                                               |
| antibody                           | anti-DUX4 (Rabbit monoclonal)       | Abcam                      | Cat#ab124699, RRID:AB_10973363 | IF(1:200), WB(1:1000)                                                                 |
| antibody                           | anti-Histone H3 (Rabbit polyclonal) | Abcam                      | Cat# ab1791, RRID:AB_302613    | WB(1:5000)                                                                            |



|                         |                                                                |                          |                                    |                                                                                                                      |
|-------------------------|----------------------------------------------------------------|--------------------------|------------------------------------|----------------------------------------------------------------------------------------------------------------------|
| antibody                | anti-SRSF3 (Mouse monoclonal)                                  | Thermo Fisher Scientific | Cat# 33-4200, RRID:AB_2533119      | WB(1:250)                                                                                                            |
| antibody                | anti-SRSF3-TR (Rabbit polyclonal)                              | This paper               |                                    | IF(1:200), WB(1:500)                                                                                                 |
| antibody                | anti-RENT1/hUPF1 (Rabbit monoclonal)                           | Abcam                    | Cat# ab109363, RRID:AB_10861979    | WB(1:1000)                                                                                                           |
| recombinant DNA reagent | pCW57.1-FLAG-SRSF3_Full.Length_Codon.Optimized-Blast (plasmid) | This paper               |                                    | All-in-one lentiviral vector for doxycycline-inducible expression of FLAG-tagged, codon-optimized, full-length SRSF3 |
| recombinant DNA reagent | pCW57.1-FLAG-SRSF3_Truncated_Codon.Optimized-Blast (plasmid)   | This paper               |                                    | All-in-one lentiviral vector for doxycycline-inducible expression of FLAG-tagged, codon-optimized, truncated SRSF3   |
| recombinant DNA reagent | pCW57-MCS1-P2A-MCS2 (Blast) (plasmid)                          | Addgene                  | Plasmid #80921, RRID:Addgene_80921 |                                                                                                                      |
| recombinant DNA reagent | pMD2.G (plasmid)                                               | Addgene                  | Plasmid #12259; RRID:Addgene_12259 |                                                                                                                      |
| recombinant DNA reagent | psPAX2 (plasmid)                                               | Addgene                  | Plasmid #12260; RRID:Addgene_12260 |                                                                                                                      |
| recombinant DNA reagent | pTwist-FLAG-SRSF3_Full.Length_Codon.Optimized (plasmid)        | This paper               |                                    | For expression of FLAG-tagged, codon-optimized full-length SRSF3 in mammalian cells; synthesized by Twist Bioscience |
| recombinant DNA reagent | pTwist-FLAG-SRSF3_Truncated_Codon.Optimized (plasmid)          | This paper               |                                    | For expression of FLAG-tagged, codon-optimized truncated SRSF3 in mammalian cells; synthesized by Twist Bioscience   |
| sequence-based reagent  | DUX4 transgene F                                               | (Shadle et al., 2019)    | qPCR primers                       | TAGGGGAAGAGGTA<br>GACGGC                                                                                             |

|                                   |                  |                          |              |                              |
|-----------------------------------|------------------|--------------------------|--------------|------------------------------|
| sequen<br>ce-<br>based<br>reagent | DUX4 transgene R | (Shadle et al.,<br>2019) | qPCR primers | CGGTTCCGGGATTC<br>CGATAG     |
| sequen<br>ce-<br>based<br>reagent | HAGHL F          | This paper               | qPCR primers | AGTTTGCCAGAAAG<br>TGGAG      |
| sequen<br>ce-<br>based<br>reagent | HAGHL R          | This paper               | qPCR primers | ATCCTCATCCCTCTT<br>CTTAGCC   |
| sequen<br>ce-<br>based<br>reagent | HSATII F         | (Shadle et al.,<br>2019) | qPCR primers | TGAATGGAATCGTCA<br>TCGAA     |
| sequen<br>ce-<br>based<br>reagent | HSATII R         | (Shadle et al.,<br>2019) | qPCR primers | CCATTCGATAATTCC<br>GCTTG     |
| sequen<br>ce-<br>based<br>reagent | HSPA5 F          | (Lin et al.,<br>2007)    | qPCR primers | CGGGCAAAGATGTC<br>AGGAAAG    |
| sequen<br>ce-<br>based<br>reagent | HSPA5 R          | (Lin et al.,<br>2007)    | qPCR primers | TTCTGGACGGGCTT<br>CATAGTAGAC |
| sequen<br>ce-<br>based<br>reagent | MYOD1 F          | Stephen<br>Tapscott      | qPCR primers | AGCACTACAGCGGC<br>GACT       |
| sequen<br>ce-<br>based<br>reagent | MYOD1 R          | Stephen<br>Tapscott      | qPCR primers | GCGACTCAGAAGGC<br>ACGTC      |
| sequen<br>ce-<br>based<br>reagent | SRSF3 F          | (Feng et al.,<br>2015)   | qPCR primers | TGGAAGTGTGAATG<br>GTGAA      |
| sequen<br>ce-<br>based<br>reagent | SRSF3-Excl R     | (Feng et al.,<br>2015)   | qPCR primers | CTTGGAGATCTGCG<br>ACGAG      |
| sequen<br>ce-<br>based<br>reagent | SRSF3-Incl R     | (Feng et al.,<br>2015)   | qPCR primers | GGGTGGTGAGAAGA<br>GACATGA    |
| sequen<br>ce-                     | TCF3 F           | (Zeisel,<br>Yitzhaky,    | qPCR primers | CCCCAGGAGAATGA<br>ACCAG      |

|                              |                                                  |                                   |              |                      |
|------------------------------|--------------------------------------------------|-----------------------------------|--------------|----------------------|
| based reagent                |                                                  | Bossel Ben-Moshe, & Domany, 2013) |              |                      |
| sequencing-based reagent     | TCF3 R                                           | (Zeisel et al., 2013)             | qPCR primers | CCTTCCCGTTGGTGACAG   |
| sequencing-based reagent     | RPL27 F                                          | (Jagannathan et al., 2016)        | qPCR primers | GCAAGAAGAAGATCGCCAAG |
| sequencing-based reagent     | RPL27 R                                          | (Jagannathan et al., 2016)        | qPCR primers | TCCAAGGGGATATCCACAGA |
| sequencing-based reagent     | ZSCAN4 F                                         | (Geng et al., 2012)               | qPCR primers | TGGAAATCAAGTGGCAAAAA |
| sequencing-based reagent     | ZSCAN4 R                                         | (Geng et al., 2012)               | qPCR primers | CTGCATGTGGACGTGGAC   |
| peptide, recombinant protein | Insulin-Transferrin-Selenium                     | Thermo Fisher Scientific          | 41400045     |                      |
| peptide, recombinant protein | Protein G Sepharose                              | Thermo Fisher Scientific          | 101241       |                      |
| peptide, recombinant protein | Recombinant human basic fibroblast growth factor | Promega                           | G5071        |                      |
| chemical compound, drug      | Blasticidin S HCl                                | Thermo Fisher Scientific          | R21001       |                      |
| chemical compound, drug      | Cycloheximide                                    | Sigma-Aldrich                     | 239765       |                      |

|                         |                                                      |                          |                         |                                                                                                                                                          |
|-------------------------|------------------------------------------------------|--------------------------|-------------------------|----------------------------------------------------------------------------------------------------------------------------------------------------------|
| chemical compound, drug | Doxycycline hyclate                                  | Sigma-Aldrich            | D9891                   |                                                                                                                                                          |
| chemical compound, drug | Lipofectamine 2000 Transfection Reagent              | Thermo Fisher Scientific | 11668-030               |                                                                                                                                                          |
| chemical compound, drug | Puromycin dihydrochloride                            | VWR                      | 97064-280               |                                                                                                                                                          |
| chemical compound, drug | TRIzol Reagent                                       | Thermo Fisher Scientific | 15596018                |                                                                                                                                                          |
| commercial assay or kit | BCA Protein Assay Kit                                | Pierce                   | 23225                   |                                                                                                                                                          |
| commercial assay or kit | Direct-zol RNA Miniprep Kit                          | Zymo Research            | R2051                   |                                                                                                                                                          |
| commercial assay or kit | NEXTflex Rapid Directional qRNA-Seq Kit              | Bioo Scientific          | NOVA-5130-02D           |                                                                                                                                                          |
| commercial assay or kit | NEXTflex Small RNA-Seq Kit v3                        | Bioo Scientific          | NOVA-5132-06            |                                                                                                                                                          |
| commercial assay or kit | Ribo-Zero rRNA Removal Kit                           | Illumina                 | MRZH11124, discontinued |                                                                                                                                                          |
| commercial assay or kit | SuperScript III First-Strand Synthesis System        | Thermo Fisher Scientific | 18080051                |                                                                                                                                                          |
| software, algorithm     | Code used for RNA-seq and Ribo-seq figure generation | This paper               |                         | The code used for the RNA-seq and Ribo-seq figure generation can be accessed via github at <a href="https://github.com/sjag">https://github.com/sjag</a> |

|                     |                |                                                                            |                 |                                         |
|---------------------|----------------|----------------------------------------------------------------------------|-----------------|-----------------------------------------|
|                     |                |                                                                            |                 | anna/2021-campbell_dyle_calviello_et_al |
| software, algorithm | GraphPad Prism | GraphPad Prism ( <a href="https://graphpad.com">https://graphpad.com</a> ) | RRID:SCR_002798 | Version 9                               |
| software, algorithm | ImageJ         | ImageJ ( <a href="https://imagej.nih.gov">https://imagej.nih.gov</a> )     | RRID:SCR_003070 |                                         |
